# Supplementary material for: Anti-cancer activity of heteroaromatic acetals of andrographolide and its isomers
Source: Royal Society of Chemistry journal article supplement (doi:10.1039/d2nj01055k), 2022-01-01
Supplement: d2nj01055k1.pdf [file d2nj01055k1.pdf]

## Anti-cancer activity of heteroaromatic acetals of andrographolide and its isomers

### Supplementary Section

#### Synthesis of heteroaromatic (3,19) acetals of andrographolide

##### 3,19-Benzylidene-andrographolide (**2a**)

Andrographolide (**1**) (5g) was dissolved in a mixture of toluene (100ml) and DMSO (10ml), to this benzaldehyde (6.05g) and a catalytic amount of PPTs was added (Molar ratio; Andrographolide: benzaldehyde=1:4). The reaction was allowed to stir at 70 °C till the completion of the reaction as checked by TLC. The reaction mixture was then allowed to cool to room temperature and quenched using the cold saturated bicarbonate solution and extracted with Dichloromethane (DCM). The organic layer was then washed with brine, water and dried with anhydrous sodium sulphate after which the crude product was obtained upon evaporation of the solvent. The product was purified using column chromatography (petroleum ether/acetone) 80:20 to obtain the desired compound. Yield 80%, m.p. -141-142 °C.

**IR (KBr) cm<sup>-1</sup>:** 3400 (**O-H stretch**), 3081 (aromatic C-H stretch), 2944 (sp<sup>3</sup> C-H stretch), 1751 (C=O stretch), 1675 (exocyclic C=C stretch), 1199 (C-O stretch), 988, 906, 800 & 761 (aromatic C-H out of plane bending). **<sup>1</sup>H NMR (400 MHz, CDCl<sub>3</sub>):** δ 7.49 (2H, d, J=7.6 Hz, H-23, H-27), 7.36 (3H, m, H-24, H-25, H-26), 6.95 (1H, dt, J=7.04 Hz, 1.48Hz, H-12), 5.76 (1H, s, H-21), 4.99 (1H, brs, H-14), 4.91 (1H, brs, H<sub>a</sub>-17), 4.63 (1H, brs, H<sub>b</sub>-17), 4.43 (1H, dd, J=10.44 Hz, 6.12 Hz, H<sub>a</sub>-15), 4.28-4.21 (2H, m, H<sub>b</sub>-15, H<sub>a</sub>-19), 3.67 (1H, dd, J=12.64 Hz, 4.48 Hz, H-3), 3.59 (1H, d, J=11.32, H<sub>b</sub>-19), 2.63-2.62 (1H, m, -OH), 2.59-2.54 (2H, m), 2.47-2.43 (2H, m), 2.05-1.99 (1H,m), 1.92-1.83 (4H, m), 1.49 (3H, s), 1.31-1.25 (3H, m), 0.87 (3H, m). **<sup>13</sup>C NMR(100 MHz, CDCl<sub>3</sub>):** δ 170.11 (C-16), 148.88 (C-8), 146.51 (C-12), 138.79 (C-22), 128.91 (C-13), 128.36 (C-24, C-26), 128.01 (C-25), 126.20 (C-23, C-27) 109.23 (C-17), 95.24 (C-21), 80.67 (C-3), 74.35 (C-15), 69.48 (C-19), 66.14 (C-14), 55.75 (C-9), 54.81

(C-5), 38.88 (C-4), 37.58 (C-7), 36.93 (C-10), 36.08 (C-1), 26.05 (C-2), 24.75 (C-6), 22.78 (C-11), 21.70 (C-20), 15.35 (C-18), **Mass (m/z):** [M+H]<sup>+</sup> 439.2459, [M+Na]<sup>+</sup> 461.2277, [2M+Na]<sup>+</sup> 899.4669

### 3,19-(2-Furfurylidene)-andrographolide (**2b**)

Compound **2b** was synthesized from **1** following the same method described for the synthesis of **2a**. Yield 74%, m.p. - 193-196 °C. **IR (KBr) cm<sup>-1</sup>:** 3405 (**O-H stretch**), 3133 (aromatic C-H stretch), 2942 (sp<sup>3</sup> C-H stretch), 1726 (C=O stretch), 1675 (exocyclic C=C stretch), 1222 (C-O stretch), 983, 810 & 745 (aromatic C-H out of plane bending). **<sup>1</sup>H NMR (400 MHz, CDCl<sub>3</sub>):** δ 7.40 (1H, brs, H-25), 6.95 (1H, brs, H-12), 6.44 (1H, s, H-24), 6.36 (1H, s, H-23), 5.85 (1H, s, H-21), 5.01 (1H, brs, H-14), 4.91 (1H, brs, H<sub>a</sub>-17), 4.62 (1H, brs, H<sub>b</sub>-17), 4.47-4.43 (1H, m, H<sub>a</sub>-15), 4.26-4.22 (2H, m, H<sub>b</sub>-15, H<sub>a</sub>-19), 3.67 (1H, d, J=12Hz, H-3), 3.57 (1H, d, J=11.24Hz, H<sub>b</sub>-19), 2.58-2.57 (2H, m), 2.46-2.35 (2H, m), 2.04-1.98 (1H, m), 1.88-1.85 (4H, m), 1.71-1.68 (1H, m), 1.47 (3H, s, H-18), 1.29-1.25 (3H, m), 0.85 (3H, s, H-20); **<sup>13</sup>C NMR (100 MHz, CDCl<sub>3</sub>):** δ 170.13 (C-16), 151.39 (C-22), 148.84 (C-8), 146.39 (C-12), 142.50 (C-25), 128.03 (C-13), 110.2 (C-24), 109.29 (C-22), 107.42 (C-17), 89.72 (C-21), 80.96 (C-3), 74.41 (C-15), 69.38 (C-19), 66.15 (C-14), 55.69 (C-9), 54.75 (C-5), 38.82 (C-4), 37.52 (C-7), 37.02 (C-10), 35.96 (C-1), 25.88 (C-2), 24.72 (C-6), 22.73 (C-11), 21.51 (C-20), 15.30 (C-18), **Mass (m/z):** [M+H]<sup>+</sup> 429.2259, [M+Na]<sup>+</sup> 451.2080, [2M+Na]<sup>+</sup> 879.4245

### 3,19-(2-Pyridylidene)-andrographolide (**2c**)

Compound **2c** was synthesized from **1** following the same method described for the synthesis of **2a**. Yield 60%, m.p. - 193-196 °C. **IR (KBr) cm<sup>-1</sup>:** 3409 (**O-H stretch**), 3082 (aromatic C-H stretch), 2941 (sp<sup>3</sup> C-H stretch), 1756 (C=O stretch), 1675 (exocyclic C=C stretch), 1222 (C-O stretch), 981, 906 & 708 (aromatic C-H out of plane bending). **<sup>1</sup>H NMR (400 MHz, CDCl<sub>3</sub>):** δ 8.5 (1H, brs, H-26), 7.77 (1H, t, J=7.5, 7.4 Hz, H-24), 7.6 (1H, d, J=7.6 Hz, H-23),

7.29-7.27 (1H, m, H-25), 6.94 (1H, brs, H-12), 5.84 (1H, s, H-21), 5.05 (1H, brs, H-14), 4.91(1H, brs, H<sub>a</sub>-17), 4.65 (1H, brs, H<sub>a</sub>-17), 4.45-4.42 (1H, m, H<sub>a</sub>-15), 4.31 (1H, d, J=11.32, H<sub>a</sub>-19), 4.24 (1H, d, J=10.24, H<sub>b</sub>-15), 3.71 (1H, d, J=12.12Hz, H-3), 3.62 (1H, d, J=11.20 Hz, H<sub>b</sub>-19), 2.59 (2H, brs), 2.46 (2H, d, J=13.00 Hz), 2.02-1.99 (1H, m), 1.86 (5H, brs), 1.48 (3H, s, H-18), 1.31-1.25 (3H, m), 0.86 (3H, s, H-20); <sup>13</sup>C NMR (100 MHz, CDCl<sub>3</sub>): δ 170.19 (C-16), 157.29 (C-22), 148.65 (C-26), 148.49 (C-8), 146.32 (C-12), 137.23 (C-24), 128.13 (C-13), 124.00 (C-23), 120.59 (C-25), 109.43 (C-17), 95.31 (C-21), 80.83 (C-3), 74.45 (C-15), 69.53 (C-19), 66.00 (C-14), 55.76 (C-9), 54.79 (C-5), 38.84 (C-4), 37.55 (C-7), 37.01 (C-10), 36.00 (C-1), 26.00 (C-2), 24.66 (C-6), 22.75 (C-11), 21.70 (C-20,) 15.31 (C-18),  
**Mass (m/z):** [M+H]<sup>+</sup> 440.2426, [2M+Na]<sup>+</sup> 901.4589

### 3,19-(2-Thiophenylidene)-andrographolide (**2d**)

Compound **2d** was synthesized from **1** following the same method described for the synthesis of **2a**. Yield 66%, m.p. - 193-196 °C. IR (KBr) cm<sup>-1</sup>: 3389 (O-H stretch), 3113 (aromatic C-H stretch), 2939 (sp<sup>3</sup> C-H stretch), 1726 (C=O stretch), 1675 (exocyclic C=C stretch), 1187 (C-O stretch), 978, 904 & 705 (aromatic C-H out of plane bending). <sup>1</sup>H NMR (400 MHz, CDCl<sub>3</sub>): δ 7.29 (1H, brs, H-25), 7.12 (1H, brs, H-24), 6.98-6.93 (2H, m, H-23, H-12), 6.03 (1H, s, H-21), 4.99 (1H, brs, H-14), 4.91 (1H, s, H<sub>a</sub>-17), 4.62 (1H, s, H<sub>b</sub>-17), 4.46-4.42 (1H, m, H<sub>a</sub>-15), 4.27-4.22 (2H, m, H<sub>b</sub>-15, H<sub>a</sub>-19), 3.67 (1H, d, J=11.76 Hz, H-3), 3.57 (1H, d, J=11.32 Hz, H-19<sub>b</sub>), 2.67-2.66 (1H, m, H<sub>a</sub>-2), 2.58-2.54(2H, m, H<sub>b</sub>-2, -OH), 2.46-2.33 (2H, m, H<sub>a</sub>-7, H<sub>a</sub>-11), 2.04-1.99 (1H, m, H<sub>b</sub>-7), 1.91-1.80 (4H, m, H-9, H<sub>a</sub>-1, H<sub>a</sub>-6, H<sub>b</sub>-11), 1.47 (3H, s, H-18), 1.32-1.21 (3H, m, H<sub>b</sub>-6, H<sub>b</sub>-1, H-5), 0.85(3H, s, H-20); <sup>13</sup>C NMR (100 MHz, CDCl<sub>3</sub>): δ 170.14 (C-16), 148.86 (C-12), 146.42 (C-22), 141.96 (C-8), 128.02 (C-13), 126.39 (C-25), 125.16 (C-24), 125.08 (C-23), 109.4 (C-17), 91.9 (C-21), 80.87 (C-3), 74.41 (C-15), 69.39 (C-19), 66.14 (C-14), 55.68 (C-9), 54.72 (C-5), 38.83 (C-4), 37.54 (C-7), 36.86 (C-

10), 36.01 (C-1), 25.92 (C-2), 24.73 (C-6), 22.74 (C-11), 21.71 (C-20), 15.32 (C-18), **Mass (m/z):** [M+H]<sup>+</sup> 445.2033

### 12-Hydroxy-3,19-benzylidene-andrographolide (**3a**)

3,19-Benzylidene-andrographolide (200mg) was dissolved in DCM (2ml) and to it catalytic amount of PDC (8mg) was added and stirred at room temperature till the completion of the reaction as confirmed by TLC (4days). The reaction contents were impregnated on silica gel (60-120 mesh) and column chromatography (petroleum ether/acetone:70/30) was carried out to obtain the desired compound (3a). Yield 80%, m.p. - 198-200 °C. **IR (KBr) cm<sup>-1</sup>:** 3469 (**O-H stretch**), 3078 (aromatic C-H stretch), 2947 (sp<sup>3</sup> C-H stretch), 1734 (C=O stretch), 1638 (exocyclic C=C stretch), 1194 (C-O stretch), 995, 887, 832 & 762 (aromatic C-H out of plane bending). **<sup>1</sup>H NMR (400 MHz, CDCl<sub>3</sub>):** δ 7.48 (2H, brs, H-23, H-27), 7.34 (3H, m, H-24, H-25, H-26), 7.28 (1H, m, H-14), 5.75 (1H, s, H-21), 4.93 (1H, s, H<sub>a</sub>-17), 4.84 (2H, brs, H-15), 4.77 (1H, s, H<sub>b</sub>-17), 4.54 (1H, brs, H-12), 4.25 (1H, d, J=10.44 Hz, H<sub>a</sub>-19), 3.65 (1H, m, H-3), 3.57 (1H, d, J=10.56 Hz, H<sub>b</sub>-19), 2.67 (12-OH), 2.43 (2H, m, H-7), 2.06-1.82 (6H, m), 1.62 (1H, m), 1.47 (3H, m), 1.25 (3H, s, H-20), 1.13(1H, m), 0.81(3H, s, H-18); **<sup>13</sup>C NMR (100 MHz, CDCl<sub>3</sub>):** δ 173.01 (C-16), 147.98 (C-8), 145.39 (C-14), 138.89 (C-22), 136.02 (C-13), 128.90 (C-25), 128.36 (C-24, C-26), 126.23 (C-23, C-27), 108.22 (C-17), 95.22 (C-21), 80.73 (C-3), 70.52 (C-15), 69.50 (C-19), 67.40 (C-12), 54.98 (C-5), 52.91 (C-9), 39.19 (C-4), 38.06 (C-10), 36.98 (C-7), 35.81 (C-1), 30.24 (C-11), 26.04 (C-2), 23.02 (C-6), 21.70 (C-20), 15.43 (C-18), **Mass (m/z):** [M+Na]<sup>+</sup> 461.2292, [2M+Na]<sup>+</sup> 899.4672

### 12-Hydroxy-3,19-(2-furfurylidene)-andrographolide (**3b**)

Compound **3b** was synthesized from **2b** following the same method described for the synthesis of **3a**. Yield 91%, m.p. - 154-157 °C. **IR(KBr) cm<sup>-1</sup>:** 3473 (**O-H stretch**), 3126 (aromatic C-H stretch), 2955 (sp<sup>3</sup> C-H stretch), 1754 (C=O stretch), 1642 (exocyclic C=C stretch), 1505 &

1445 (aromatic C=C), 1206 (C-O stretch), 956, 899 & 840 (aromatic C-H out of plane bending). **<sup>1</sup>H NMR (400 MHz, CDCl<sub>3</sub>):** δ 7.39 (1H, m, H-25), 7.28 (1H, m, H-14), 6.44 (1H, d, J=3.24 Hz, H-23), 6.36 (1H, dd, J=3.24, 1.8 Hz, H-24), 5.83 (1H, s, H-21), 4.93 (1H, s, H<sub>a</sub>-17), 4.85 (2H, s, H-15), 4.77 (1H, s, H<sub>b</sub>-17), 4.54 (1H, brs, H-12), 4.21 (1H, d, J=11.4 Hz, H<sub>a</sub>-19), 3.64 (1H, dd, J=12.72, 4.88 Hz, H-3), 3.55 (1H, d, J=11.4 Hz, H<sub>b</sub>-19), 2.63 (12-OH), 2.46-2.28 (2H, m), 2.10-2.05 (1H, m), 1.95-1.77 (6H, m), 1.62-1.59 (1H, m), 1.45 (3H, s, H-20), 1.25 (2H, s), 1.16-1.09 (1H, m), 0.79 (3H, s, H-18); **<sup>13</sup>C NMR (100 MHz, CDCl<sub>3</sub>):** δ 172.98 (C-16), 147.88 (C-8), 145.35 (C-14), 151.47 (C-22), 136.00 (C-13), 142.50 (C-25), 110.19 (C-24), 108.29 (C-23), 107.41 (C-17), 89.71 (C-21), 80.77 (C-3), 70.51 (C-15), 69.40 (C-19), 67.45 (C-12), 54.94 (C-5), 52.90 (C-9), 39.13 (C-4), 38.01 (C-10), 37.05 (C-7), 35.71 (C-1), 30.21 (C-11), 25.87 (C-2), 22.97 (C-6), 21.48 (C-20), 15.40 (C-18); **Mass (m/z):** [M+H]<sup>+</sup> 429.2253, [M+Na]<sup>+</sup> 451.2076, [2M+Na]<sup>+</sup> 879.4256

### 12-Hydroxy-3,19-(2-pyridylidene)-andrographolide (**3c**)

Compound **3c** was synthesized from **2c** following the same method described for the synthesis of **3a**. Yield 60 %, m.p. - 192-195 °C. **IR (KBr) cm<sup>-1</sup>:** 3454 (O-H stretch), 3096 (aromatic C-H stretch), 2949 (sp<sup>3</sup> C-H stretch), 1758 (C=O stretch), 1644 (exocyclic C=C stretch), 1598 & 1444 (aromatic C=C), 1194 (C-O stretch), 990, 879 & 784 (aromatic C-H out of plane bending). **<sup>1</sup>H NMR (400 MHz, CDCl<sub>3</sub>):** δ 8.57 (1H, brs, H-26), 7.74 (1H, brs, H-24), 7.64 (1H, brs, H-23), 7.29 (2H, m, H-25, H-14), 5.83 (1H, s, H-21), 4.93 (1H, s, H<sub>a</sub>-17), 4.84 (2H, s, H-15), 4.77 (1H, s, H<sub>b</sub>-17), 4.55 (1H, brs, H-12), 4.30 (1H, d, J=10.8 Hz, H<sub>a</sub>-19), 3.70 (1H, m, H-3), 3.60 (1H, d, J=10.48 Hz, H<sub>b</sub>-19), 2.70 (12-OH), 2.44 (2H, m), 2.07-2.06 (1H, m), 1.96-1.73 (6H, m), 1.64-1.62 (1H, m), 1.46 (3H, s, H-20), 1.26 (2H, s), 1.18-1.11 (1H, m), 0.81 (3H, s, H-18); **<sup>13</sup>C NMR (100 MHz, CDCl<sub>3</sub>):** δ 173.00 (C-16), 148.96 (C-8), 145.33 (C-14), 157.40 (C-22), 136.09 (C-13), 120.86 (C-25), 136.97 (C-24), 148.96 (C-26), 123.83 (C-23), 108.24 (C-17), 95.44 (C-21), 80.86 (C-3), 70.50 (C-15), 69.59 (C-19), 67.40 (C-12), 54.98 (C-5), 52.92 (C-9),

39.18 (C-4), 38.04 (C-10), 37.04 (C-7), 35.76 (C-1), 30.26 (C-11), 26.02 (C-2), 22.99 (C-6), 21.63 (C-20), 15.36 (C-18); **Mass (m/z):** M+H]<sup>+</sup> 440.2460, [2M+Na]<sup>+</sup> 901.4667

#### 12-Hydroxy-3,19-(2-thiophenylidene)-andrographolide (**3d**)

Compound **3d** was synthesized from **2d** following the same method described for the synthesis of **3a**. Yield 91%, m.p. - 195-197 °C. **IR (KBr) cm<sup>-1</sup>:** 3480 (**O-H stretch**), 3080 (aromatic C-H stretch), 2968 (sp<sup>3</sup> C-H stretch), 1733 (C=O stretch), 1640 (exocyclic C=C stretch), 1190 (C-O stretch), 996, 888 & 831 (aromatic C-H out of plane bending). **<sup>1</sup>H NMR (400 MHz, CDCl<sub>3</sub>):** δ 7.28 (2H, brs, H-25, H-14), 7.11 (1H, brs, H-23), 6.97 (1H, brs, H-24), 6.02 (1H, s, H-21), 4.93 (1H, s, H<sub>a</sub>-17), 4.84 (2H, s, H-15), 4.77 (1H, s, H<sub>b</sub>-17), 4.54 (1H, brs, H-12), 4.23 (1H, d, J=10.32 Hz, H<sub>a</sub>-19), 3.65 (1H, m, H-3), 3.55 (1H, d, J=10.68 Hz, H<sub>b</sub>-19), 2.64 (12-OH), 2.46-2.34 (2H, m), 2.07-1.82 (7H, m), 1.62-1.61 (1H, m), 1.45 (3H, s, H-20), 1.25 (2H, s), 1.12 (1H, m), 0.79 (3H, s, H-18); **<sup>13</sup>C NMR (100 MHz, CDCl<sub>3</sub>):** δ 173.00 (C-16), 147.92 (C-8), 145.38 (C-14), 142.07 (C-22), 136.01 (C-13), 126.38 (C-25), 125.72 (C-24), 125.09 (C-23), 108.27 (C-17), 91.84 (C-21), 80.94 (C-3), 70.52 (C-15), 69.42 (C-19), 67.42 (C-12), 54.91 (C-5), 52.89 (C-9), 39.15 (C-4), 38.04 (C-10), 36.89 (C-7), 35.75 (C-1), 30.22 (C-11), 25.92 (C-2), 22.99 (C-6), 21.67 (C-20), 15.42 (C-18); **Mass (m/z):** [M+H]<sup>+</sup> 445.2020, [M+Na]<sup>+</sup> 467.1846

#### 14-Deoxy-12-hydroxy-andrographolide (**4**)

Compound **3a** was dissolved in 15ml of MeOH. To the solution catalytic amount of TsOH was added and sonicated for 30 min. The reaction mixture was then diluted with EtOAc and washed with saturated bicarbonate solution and the organic layer was separated and left for drying to obtain the desired product (**4**). Yield 54%, m.p. - 152-155 °C. **IR (KBr) cm<sup>-1</sup>:** 3379 (**O-H stretch**), 3080 (sp<sup>2</sup> C-H stretch) 2944 (sp<sup>3</sup> C-H stretch), 1745 (C=O stretch), 1639 (exocyclic C=C stretch), 1210 (C-O stretch). **<sup>1</sup>H NMR (400 MHz, CDCl<sub>3</sub>):** δ 7.28 (1H, m, H-14), 4.91 (1H, s, H<sub>a</sub>-17), 4.84 (2H, s, H-15), 4.73 (1H, s, H<sub>b</sub>-17), 4.52 (1H, brs, H-12), 4.16 (1H, d,

$J=11.12$  Hz,  $H_a-19$ ), 3.45 (1H, brd, H-3), 3.29 (1H, d,  $J=11.08$  Hz,  $H_b-19$ ), 2.96-2.69 (2OH, 1H, m), 2.46-2.88 (2H, m), 2.41(1H, m,  $H_a-7$ ), 2.04 (1H, m,  $H_b-7$ ), 1.89-1.71 (-OH, 3H, m), 1.29-1.05 (7H, m), 0.63 (3H, s, H-18);  **$^{13}C$  NMR (100 MHz,  $CDCl_3$ ):**  $\delta$  172.94 (C-16), 148.20 (C-8), 145.29 (C-14), 136.02 (C-13), 107.91 (C-17), 80.51 (C-3), 70.48 (C-15), 67.66 (C-12), 64.08 (C-19), 55.29 (C-5), 53.27 (C-9), 42.94 (C-4), 39.20 (C-10), 38.21 (C-7), 36.70 (C-1), 30.24 (C-11), 28.21 (C-2), 23.96 (C-6), 22.67 (C-20), 15.25 (C-18); Mass ( $m/z$ ):  $[M+Na]^+$  373.1779,  $[2M+Na]^+$  723.3678

### Isoandrographolide (**5**)

Andrographolide 10g was dissolved in cold concentrated HCl (180ml) and stirred at room temperature for 24 hours till the completion of the reaction. It was then extracted using DCM and washed with bi-carbonate solution and brine. The organic layer was dried over anhydrous sodium sulphate and concentrated. It was further purified using recrystallization with EtOAc as solvent of choice. Yield 55%, m.p.  $-199.8-202.1^\circ C$ . **IR (KBr)  $cm^{-1}$ :** 3314 (**O-H stretch**), 3015 ( $sp^2$  C-H stretch) 2932 ( $sp^3$  C-H stretch), 1761 (conj. C=O stretch), 1645 (conj. C=C stretch), 1210 (C-O stretch).  **$^1H$  NMR (400 MHz,  $CDCl_3$ , TMS):**  $\delta$  7.28 (1H, s, H-14), 4.81 (2H, s, H-15), 4.69 (1H, t,  $J=9.6$  Hz, H-12), 4.26 (1H, d,  $J=10.96$  Hz,  $H_a-19$ ), 3.45 (1H, brd, H-3), 3.36 (1H, d,  $J=10.96$  Hz,  $H_b-19$ ), 2.43 (1H, m,  $H_a-11$ ), 2.17 (1H, m,  $H_b-11$ ), 2.04 (1H, m,  $H_a-1$ ), 1.73 (3H, m,  $H_a-7$ , H-2), 1.53(3H, m,  $H_b-1$ ,  $H_a-6$ , H-9), 1.44 (1H, m,  $H_b-6$ ), 1.25 (3H, s, H-18), 1.10 (3H, s, H-17), 1.04(1H, m,  $H_b-7$ ), 0.98(1H, m, H-5), 0.95 (3H, s, H-20),  $\delta$  3.12 & 3.04 (3 and 19 -OH).  **$^{13}C$  NMR (100 MHz,  $CDCl_3$ , TMS):**  $\delta$  172.67 (C16), 143.28 (C14), 138.41 (C13), 82.73 (C8), 80.86 (C3), 73.13 (C12), 70.58 (C15), 64.21 (C19), 57.94 (C9), 52.70 (C5), 42.51 (C4), 39.00 (C7), 36.23 (C10), 35.64 (C1), 32.88 (C11), 31.56 (C17), 27.44 (C2), 22.77 (C18), 18.17 (C6), 16.45 (C20); Mass ( $m/z$ ):  $[M+H]^+$  351.2134,  $[M+Na]^+$  373.1958,  $[2M+Na]^+$  723.4024

The synthesized isoandrographolide was further treated with different aldehydes to obtain the required acetals of isoandrographolide **6a-d**.

Synthesis of heteroaromatic (3,19) acetals of isoandrographolide

3,19-Benzylidene-isoandrographolide (**6a**)

Isoandrographolide (**5**) (200mg) was dissolved in DMSO (2ml), to it benzaldehyde (232 $\mu$ l) and catalytic amount of PPTs was added (Molar ratio; Isoandrographolide: benzaldehyde=1:4). The reaction was allowed to stir at 70  $^{\circ}$ C till completion of the reaction (checked by TLC). Reaction mixture was then allowed to cool to room temperature and quenched using cold saturated sodium bi-carbonate solution and extracted with DCM. The organic layer was washed with brine, water and dried with anhydrous sodium sulphate. The product was purified using column chromatography (petroleum ether/acetone) to give the desired compound. Yield 85 %, m.p. 203.5-205.3  $^{\circ}$ C. **IR (KBr)  $\text{cm}^{-1}$** : 3110 (aromatic C-H stretch), 2946 ( $\text{sp}^3$  C-H stretch), 1757 (conj. C=O stretch), 1648 (conj. C=C stretch), 1204 (C-O stretch), 801 (aromatic C-H out of plane bending).  **$^1\text{H}$  NMR (400 MHz,  $\text{CDCl}_3$ , TMS)**:  $\delta$  7.49 (2H, brs, H-14, H-25), 7.35 (2H, brs, H-23, H-27), 7.29 (2H, m, H-24, H-26), 5.72 (1H, s, H-21), 4.81 (2H, s, H-15), 4.71 (1H, brs, H-12), 4.36 (1H, brs,  $\text{H}_a$ -19), 3.64 (2H, brs, H-3,  $\text{H}_b$ -19), 2.44 (1H, m,  $\text{H}_a$ -11), 2.22 (1H, m,  $\text{H}_b$ -11), 2.03 (1H, brs,  $\text{H}_a$ -1), 1.86 (3H, m,  $\text{H}_a$ -7, H-2), 1.60 (3H, m,  $\text{H}_b$ -1,  $\text{H}_a$ -6, H-9), 1.42 (1H, m,  $\text{H}_b$ -6), 1.48 (3H, s, H-18), 1.13 (6H, s, H-17, H-20), 1.04 (2H, m, H-5,  $\text{H}_b$ -7).  **$^{13}\text{C}$  NMR (100 MHz,  $\text{CDCl}_3$ , TMS)**:  $\delta$  172.60 (C-16), 143.21 (C-14), 138.90 (C-13), 138.34 (C-22), 128.84 (C-25), 128.32 (C-24, C-26), 126.18 (C-23, C-27), 95.35 (C-21), 82.73 (C-8), 81.36 (C-3), 73.05 (C-12), 70.55 (C-15), 69.71 (C-19), 57.94 (C-9), 51.65 (C-5), 38.18 (C-4), 36.45 (C-7), 35.91 (C-10), 35.63 (C-1), 32.77 (C-11), 31.77 (C-17), 25.96 (C-18), 21.04 (C-2), 17.29 (C-6), 16.37 (C-20); Mass ( $m/z$ ):  $[\text{M}+\text{H}]^+$  439.2488,  $[\text{M}+\text{Na}]^+$  461.2313,  $[\text{2M}+\text{Na}]^+$  899.4732



### 3,19-(2-Furfurylidene)-isoandrographolide (**6b**)

Compound **6b** was synthesized from **5** following the same method described for the synthesis of **6a**. Yield 65%, m.p. -199.5-199.8 °C. **IR (KBr) cm<sup>-1</sup>**: 3160 (aromatic C-H stretch), 2940 (sp<sup>3</sup> C-H stretch), 1736 (conj. C=O stretch), 1602 (conj. C=C stretch), 1581-1421 skeletal bands, 1206, 1092 & 1020 (C-O stretch), 925 out of plane (C-H bending), 710 (aromatic C-H out of plane bending). **<sup>1</sup>H NMR (400 MHz, CDCl<sub>3</sub>, TMS)**: δ 7.29 (1H, m, H-14), 7.25 (1H, d, J=1.72 Hz, H-25), 6.45 (1H, d, J=3.2 Hz, H-23), 6.36 (1H, dd, J=3.2, 1.8 Hz, H-24), 5.84 (1H, s, H-21), 4.81 (2H, s, H-15), 4.70 (1H, t, J=7.56 Hz, H-12), δ 4.33 (1H, d, J=11.44 Hz, H<sub>a</sub>-19), 3.62 (2H, m, H-3, H<sub>b</sub>-19), 2.46 (1H, dd, J=13.88, 7.96 Hz, H-11a), 2.33 (1H, dd, J=13.88, 2.88 Hz, H<sub>b</sub>-11), 2.03 (1H, m, H<sub>a</sub>-1), 1.86 (3H, m, H<sub>a</sub>-7, H-2), 1.56 (3H, m, H<sub>b</sub>-1, H<sub>a</sub>-6, H-9), 1.40 (1H, m, H<sub>b</sub>-6), 1.47 (3H, s, H-18), 1.11 (6H, s, H-17, H-20), 1.03 (1H, m, H<sub>b</sub>-7), 0.99 (1H, m, H-5). **<sup>13</sup>C NMR (100 MHz, CDCl<sub>3</sub>, TMS)**: δ 172.60 (C-16), 151.47 (C-22), 143.23 (C-14), 142.51 (C-25), 138.34 (C-13), 110.18 (C-23), 107.41 (C-24), 89.91 (C-21), 82.72 (C-8), 81.44 (C-3), 73.07 (C-12), 70.56 (C-15), 69.65 (C-19), 57.94 (C-9), 51.65 (C-5), 38.11 (C-4), 36.58 (C-7), 35.88 (C-10), 35.61 (C-1), 32.78 (C-11), 31.77 (C-17), 25.84 (C-2), 20.84 (C-18), 17.28 (C-6), 16.36 (C-20); Mass (*m/z*): [M+H]<sup>+</sup> 429.2266, [M+Na]<sup>+</sup> 451.2072, [2M+Na]<sup>+</sup> 879.4258

### 3,19-(2-Pyridylidene)-isoandrographolide (**6c**)

Compound **6c** was synthesized from **5** following the same method described for the synthesis of **6a**. Yield 80%, m.p. - 206-209 °C. **IR (KBr) cm<sup>-1</sup>**: 3095 (aromatic C-H stretch), 2931 (sp<sup>3</sup> C-H stretch), 1745 (conj. C=O stretch), 1653 (conj. C=C stretch), 1207 (C-O stretch), 927, 778, 743 (aromatic C-H out of plane bending). **<sup>1</sup>H NMR (400 MHz, CDCl<sub>3</sub>, TMS)**: δ 8.58 (1H, d, J=4.08 Hz, H-26), 7.74 (1H, dt, J=7.72, 1.72 Hz, H-24), 7.64 (1H, d, J=7.88 Hz, H-23), 7.29-7.28 (1H, m, H-25), 7.27-7.24 (1H, dd, J=4.88, 1.28 Hz, H-14), 5.84 (1H, s, H-21), 4.82-4.81

(2H, m, H-15), 4.71 (1H, t, J=9.52 Hz, H-12), 4.42 (1H, d, J=11.48 Hz, H<sub>a</sub>-19), 3.72-3.65 (2H, m, H-3, H<sub>b</sub>-19), 2.50-2.37 (2H, m, H-11), 2.24-2.17 (1H, m, H<sub>a</sub>-1), 2.07-1.99 (1H, m, H<sub>a</sub>-7), 1.89-1.86 (1H, m), 1.78-1.73 (2H, m), 1.58-1.56 (3H, m), 1.48 (3H, s, H-18), 1.34 (6H, s, H-17, H-20), 1.05-1.01 (2H, m). <sup>13</sup>C NMR (100 MHz, CDCl<sub>3</sub>, TMS): δ 172.56 (C-16), 143.21 (C-14), 157.40(C-22), 138.35 (C-13), 123.80 (C-23), 136.93 (C-24), 120.86 (C-25), 148.65 (C-26), 95.63 (C-21), 82.72 (C-8), 81.53 (C-3), 73.07 (C-12), 70.53 (C-15), 69.84 (C-19), 57.99 (C-9), 51.68 (C-5), 38.19 (C-4), 36.57 (C-7), 35.65 (C-10), 35.89 (C-1), 32.78 (C-11), 31.73 (C-17), 25.98 (C-2), 20.99 (C-18), 17.30 (C-6), 16.32 (C-20); Mass (*m/z*): M+H]<sup>+</sup> 440.2426, [2M+Na]<sup>+</sup> 901.4596

### 3,19-(2-Thiophenylidene)-isoandrographolide (**6d**)

Compound **6d** was synthesized from **5** following the same method described for the synthesis of **6a**. Yield 77%, m.p.- 230.1-232.6°C <sup>0</sup>C. IR (KBr) cm<sup>-1</sup>: 3111 (aromatic C-H stretch), 2945 sp<sup>3</sup> (C-H stretch), 1740 (conj. C=O stretch) , 1244,1094 & 1025 ( C-O stretch), 929 & 850 (aromatic C-H out of plane bending).<sup>1</sup>H NMR (400 MHz, CDCl<sub>3</sub>, TMS): δ 7.29 (1H, s, H-14), 7.27 (1H, s, H-25), 7.12 (1H, brs, H-23), 6.98 (1H, brs, H-24), 6.03 (1H, s, H-21), 4.82 (2H, s, H-15), 4.71 (1H, brs, H-12), 4.35 (1H, brs, H<sub>a</sub>-19), 3.64 (2H, m, H-3, H<sub>b</sub>-19), 2.46 (1H, m, H<sub>a</sub>-11), 2.20 (1H, m, H<sub>b</sub>-11), 2.03 (1H, m, H<sub>a</sub>-1), 1.74 (3H, m, H<sub>a</sub>-7, H-2), 1.57(3H, m, H<sub>b</sub>-1, H<sub>a</sub>-6, H-9), 1.44 (1H, m, H<sub>b</sub>-6), 1.46 (3H, s, H-18), 1.12 (6H, s, H-17, H-20), 1.03 (2H, m, H-5, H<sub>b</sub>-7). <sup>13</sup>C NMR (100 MHz, CDCl<sub>3</sub>, TMS): δ 172.63 (C-16), 143.24 (C-14), 142.10 (C-22), 138.53 (C-13), 126.41 (C-25), 125.69 (C-23), 125.07 (C-24), 92.05 (C-21), 82.74 (C-8), 81.59 (C-3), 73.07 (C-12), 70.58 (C-15), 69.66 (C-19), 57.94 (C-9), 51.62 (C-5), 38.15 (C-4), 36.42 (C-7), 35.90 (C-10), 35.63 (C-1), 32.79 (C-11), 31.78 (C-17), 25.89 (C-2), 21.04 (C-18), 17.30 (C-6), 16.38 (C-20); Mass (*m/z*): [M+H]<sup>+</sup> 445.2030, [M+Na]<sup>+</sup> 467.1856

# 3,19-Benzylidene-andrographolide (2a)

## <sup>1</sup>H NMR Spectrum

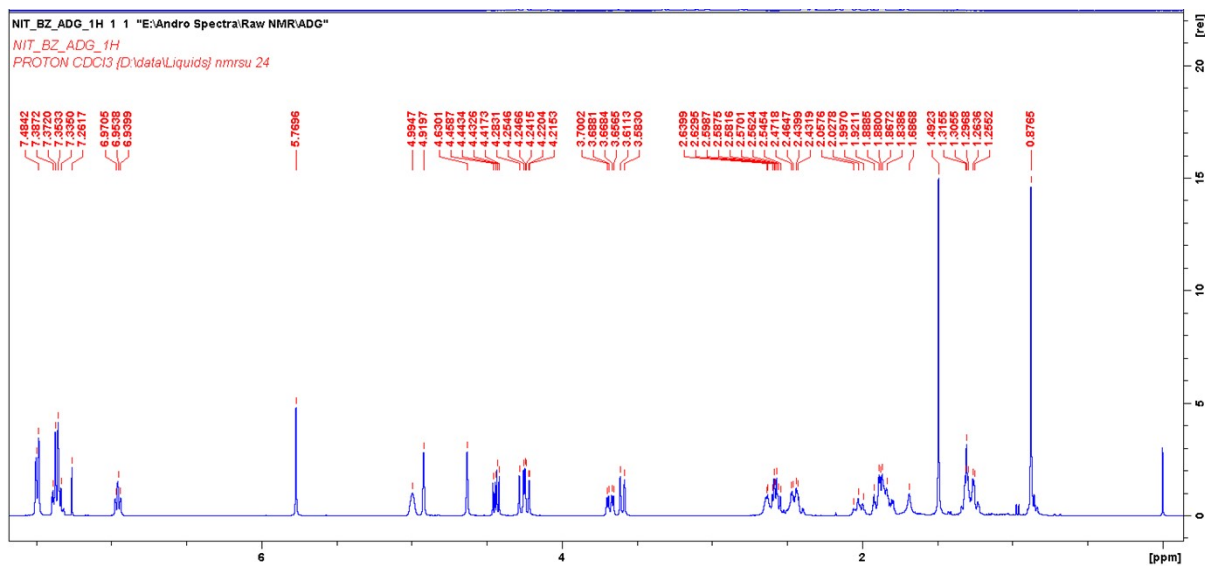

## <sup>13</sup>C NMR Spectrum

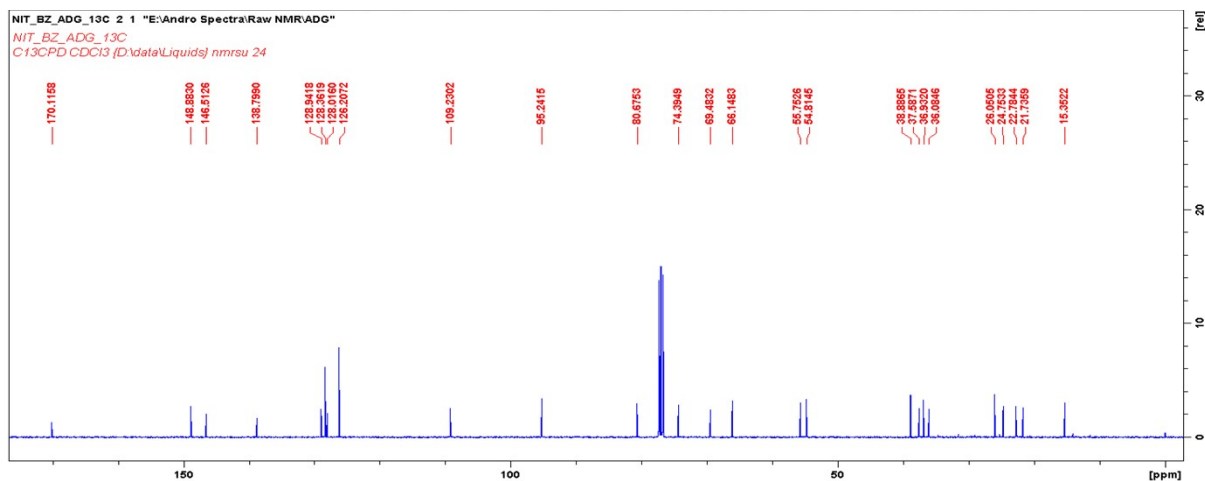

## Mass Spectrum

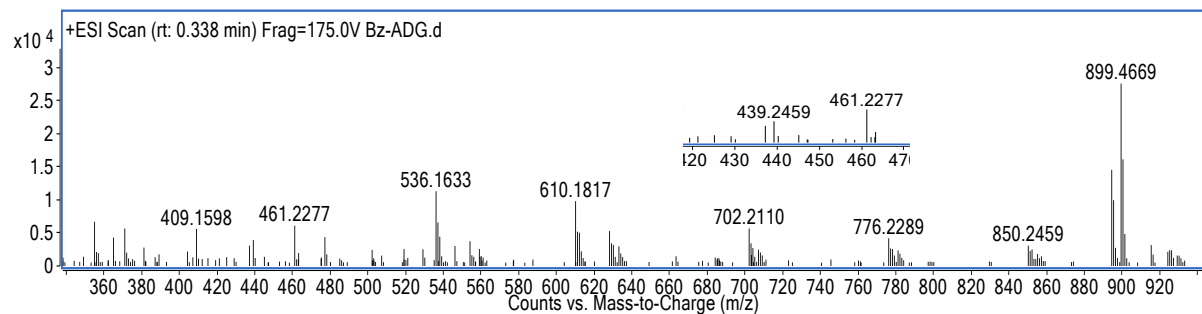

# 3,19-(2-Furfurylidene)-andrographolide (2b)

## <sup>1</sup>H NMR Spectrum

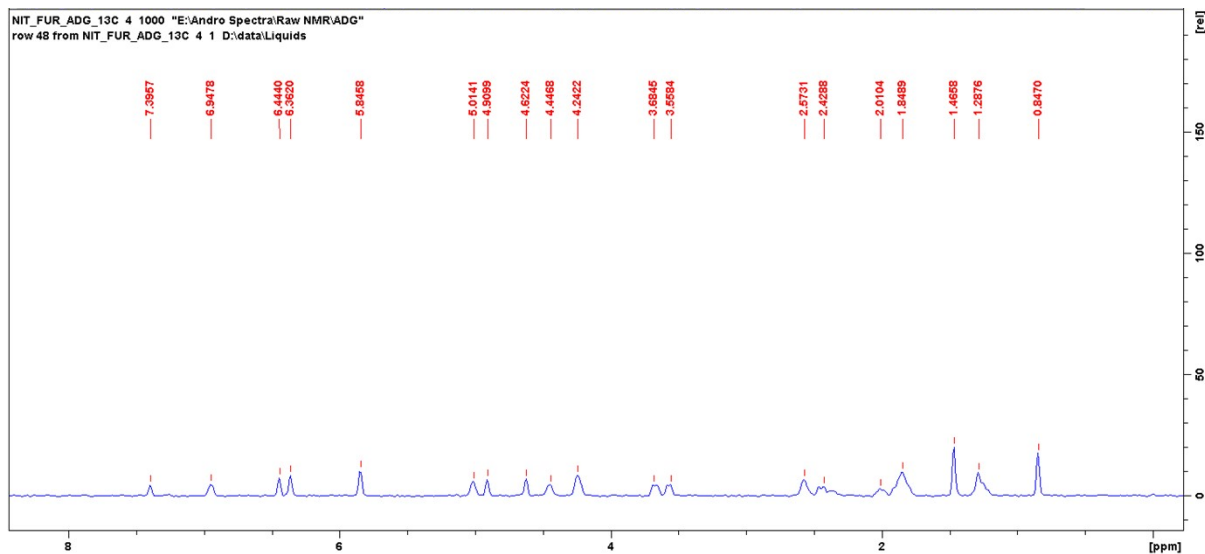

## <sup>13</sup>C NMR Spectrum

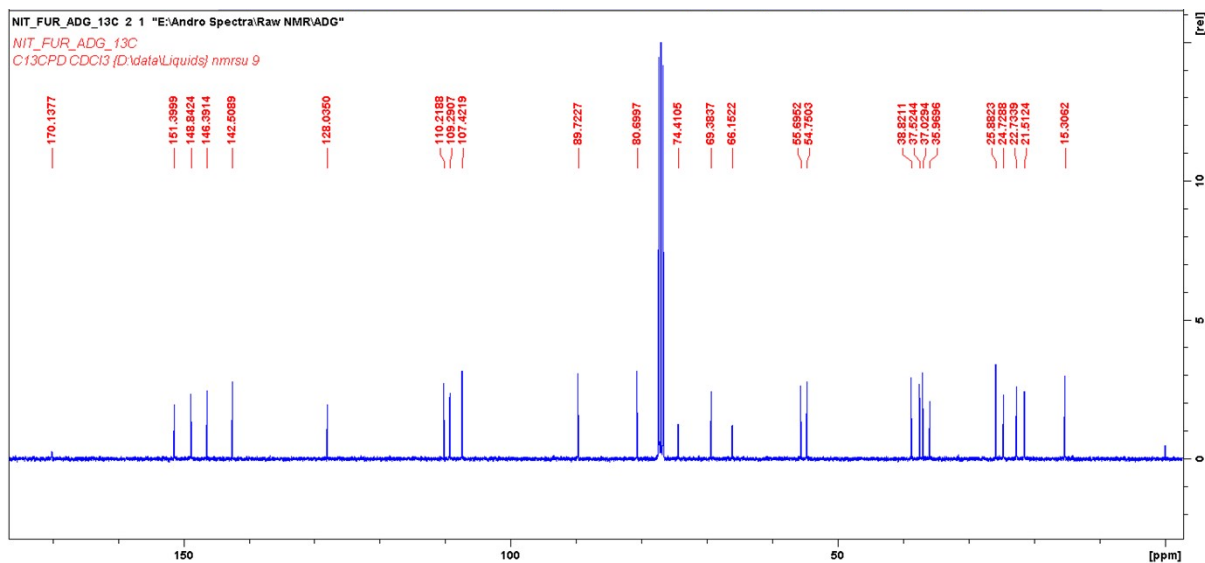

## Mass Spectrum

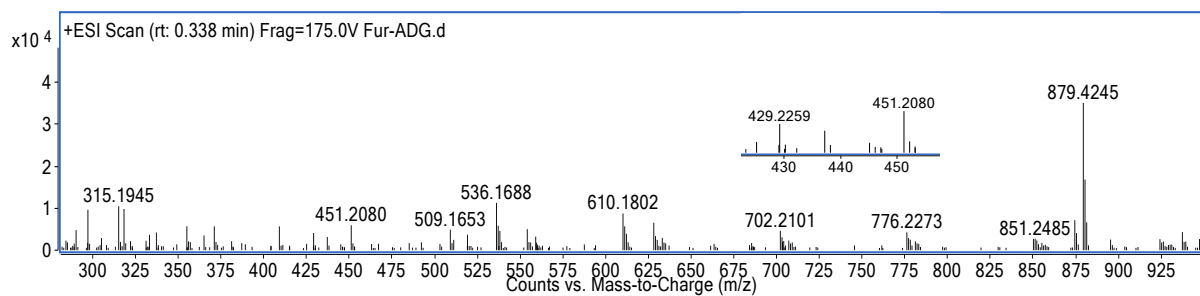

# 3,19-(2-Pyridylidene)-andrographolide (2c)

## <sup>1</sup>H NMR Spectrum

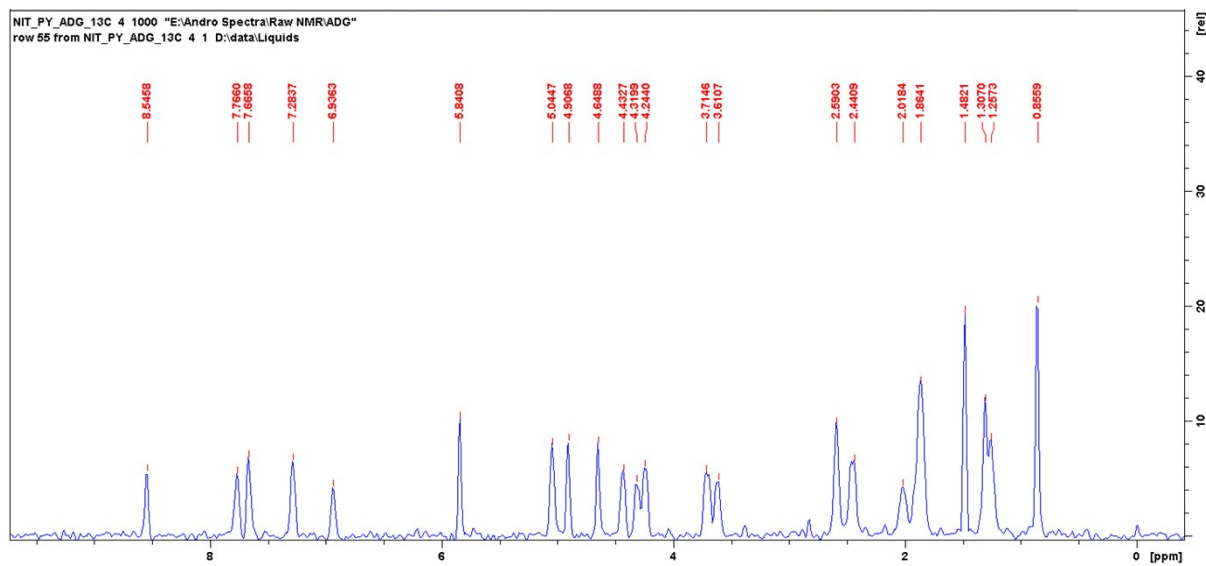

## <sup>13</sup>C NMR Spectrum

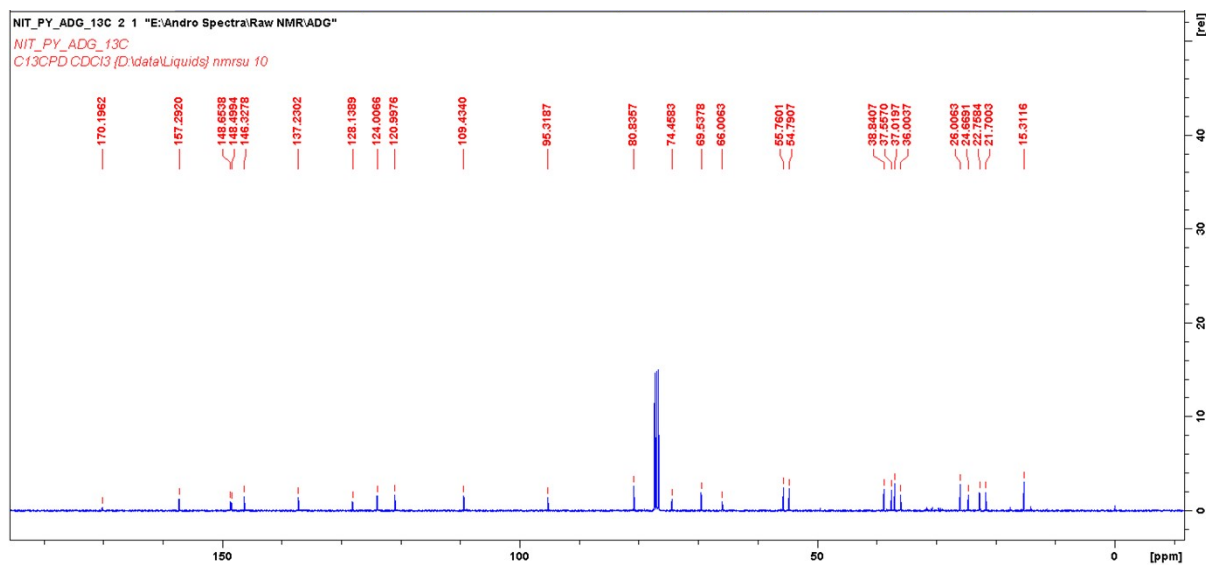

## Mass Spectrum

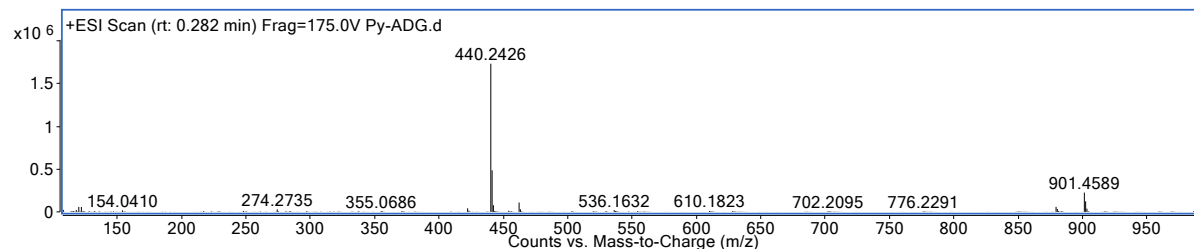

# HOMO-COSY

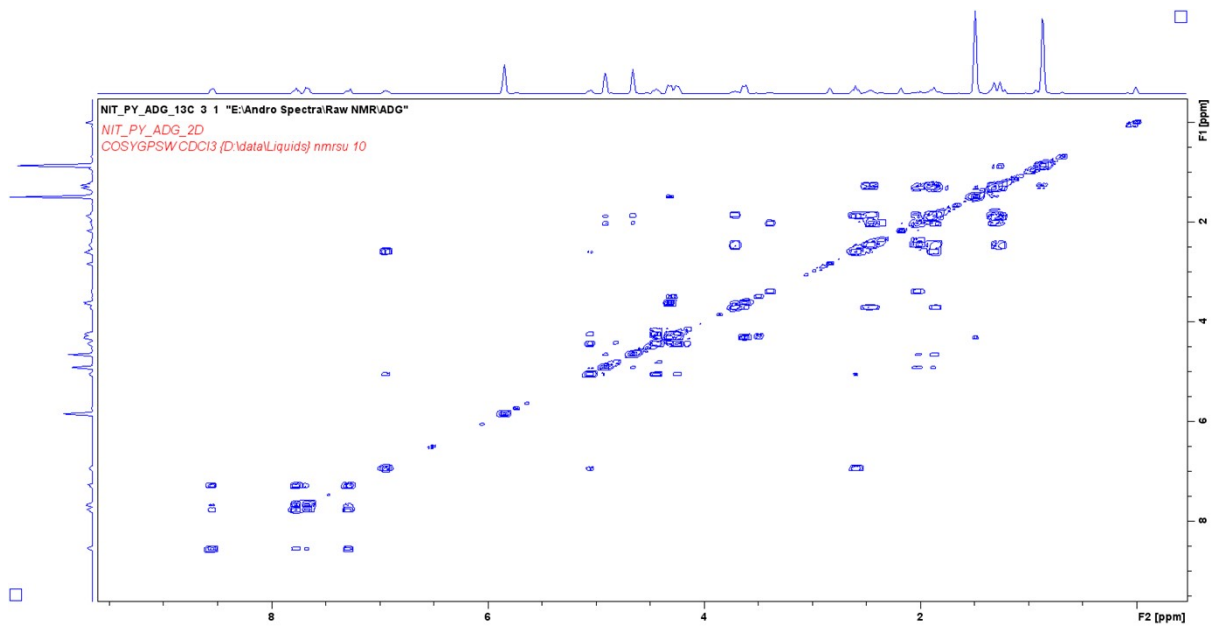

# HSQC

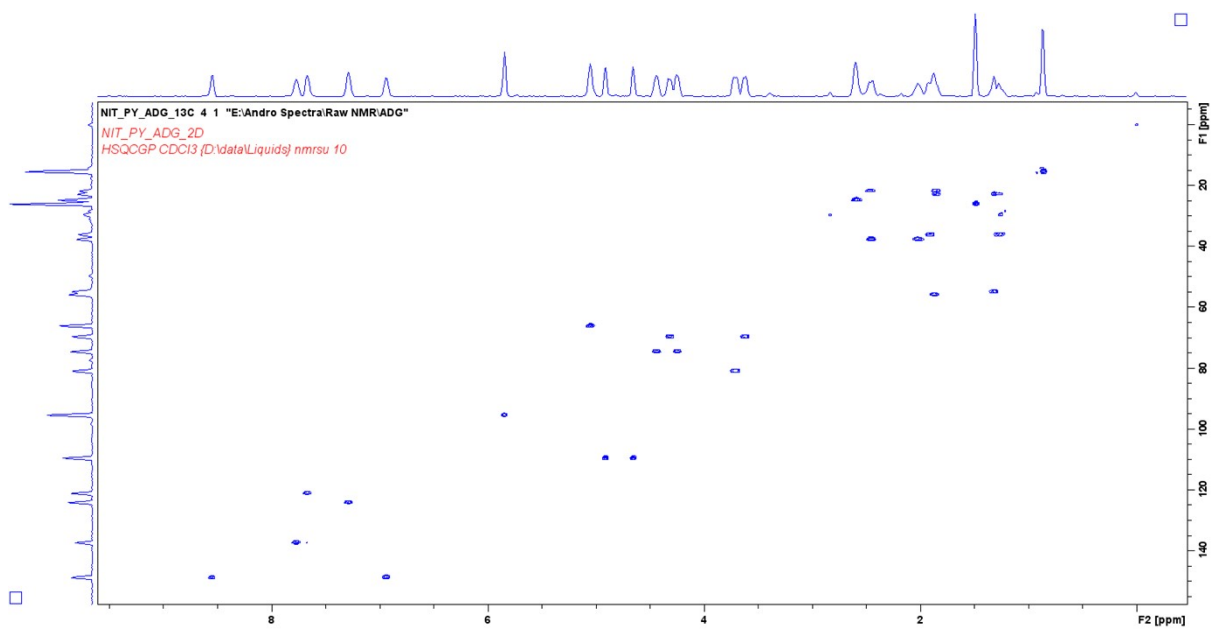

# 3,19-(2-Thiophenylidene)-andrographolide (2d)

## <sup>1</sup>H NMR Spectrum

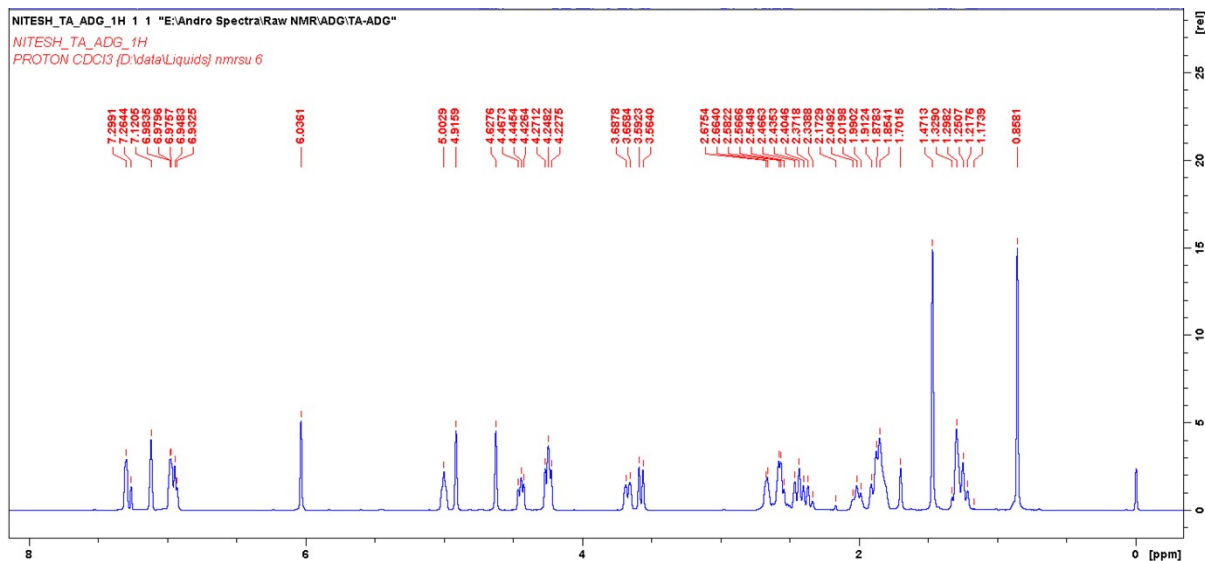

## <sup>13</sup>C NMR Spectrum

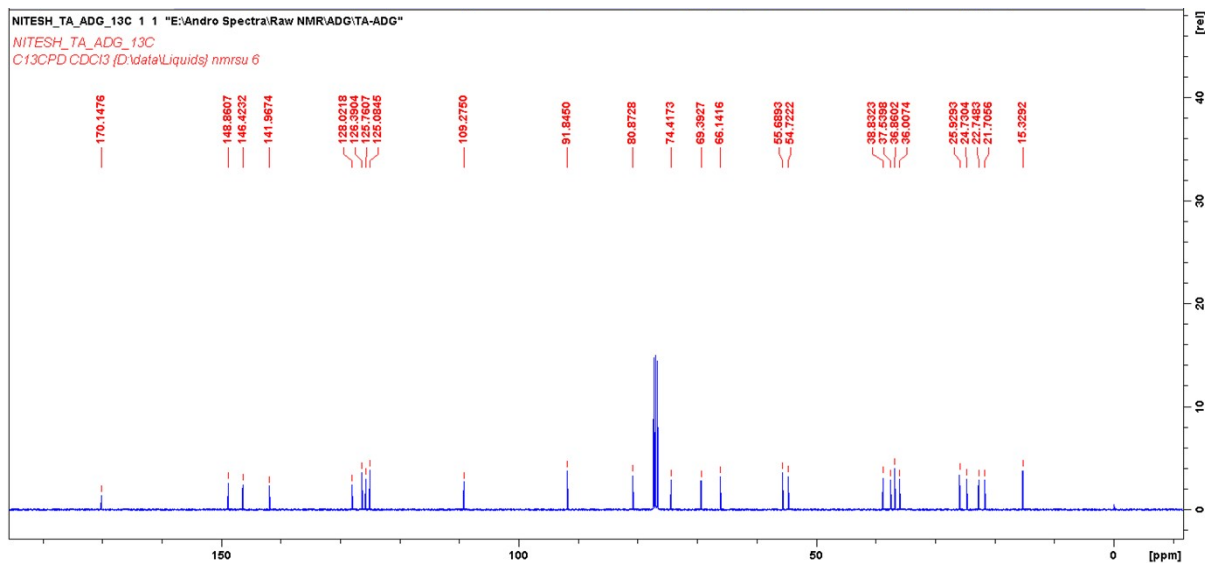

## Mass Spectrum

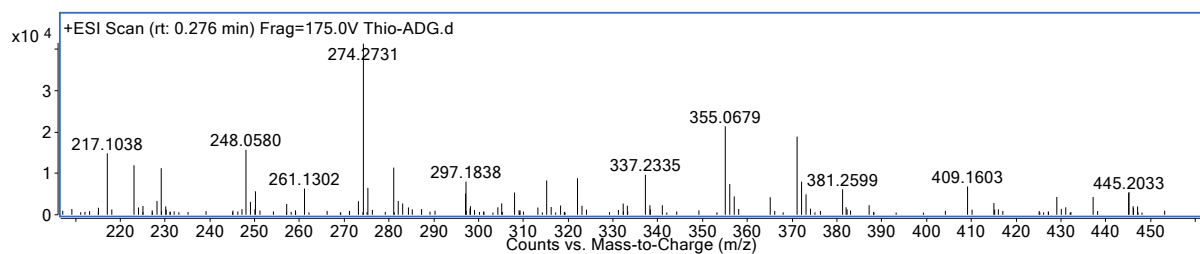

# 12-Hydroxy-3,19-benzylidene-andrographolide (3a)

## <sup>1</sup>H NMR Spectrum

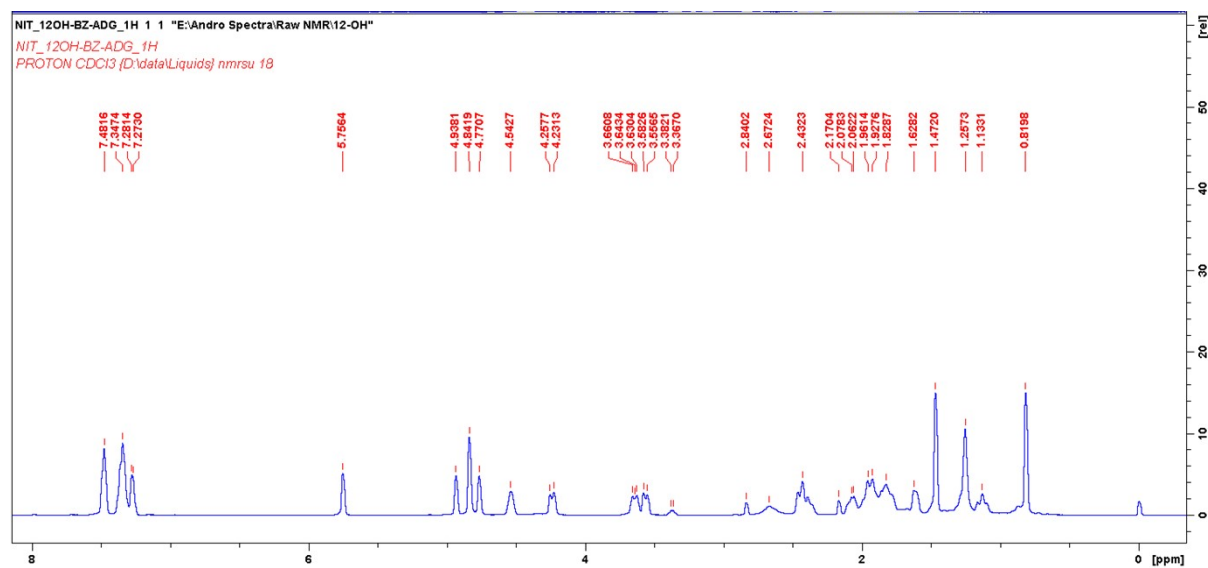

## <sup>13</sup>C NMR Spectrum

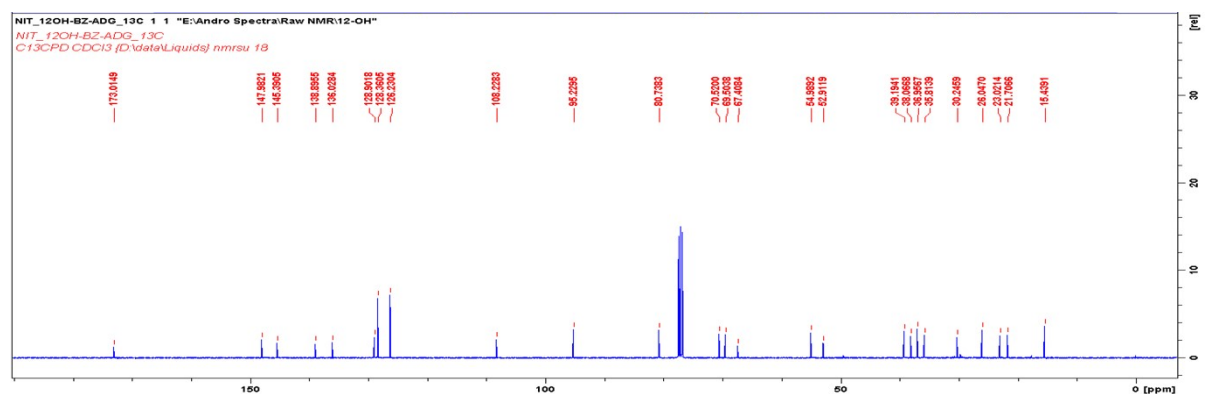

## Mass Spectrum

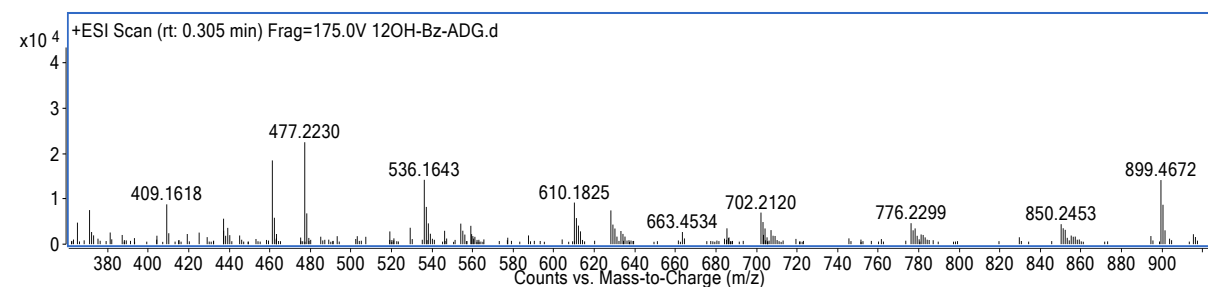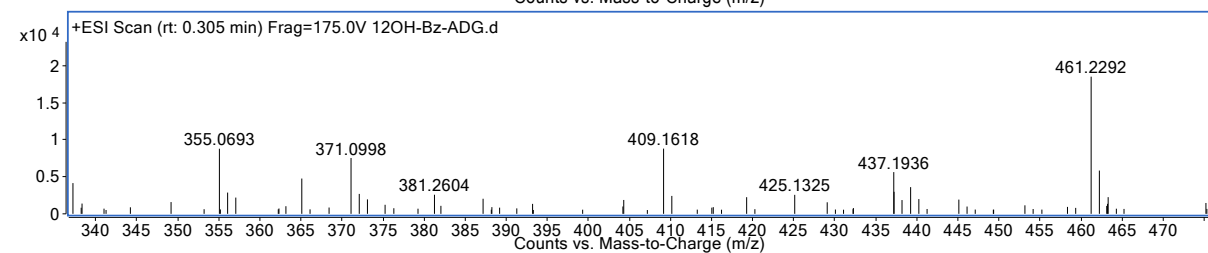



# 12-Hydroxy-3,19-(2-furfurylidene)-andrographolide (3b)

## <sup>1</sup>H NMR Spectrum

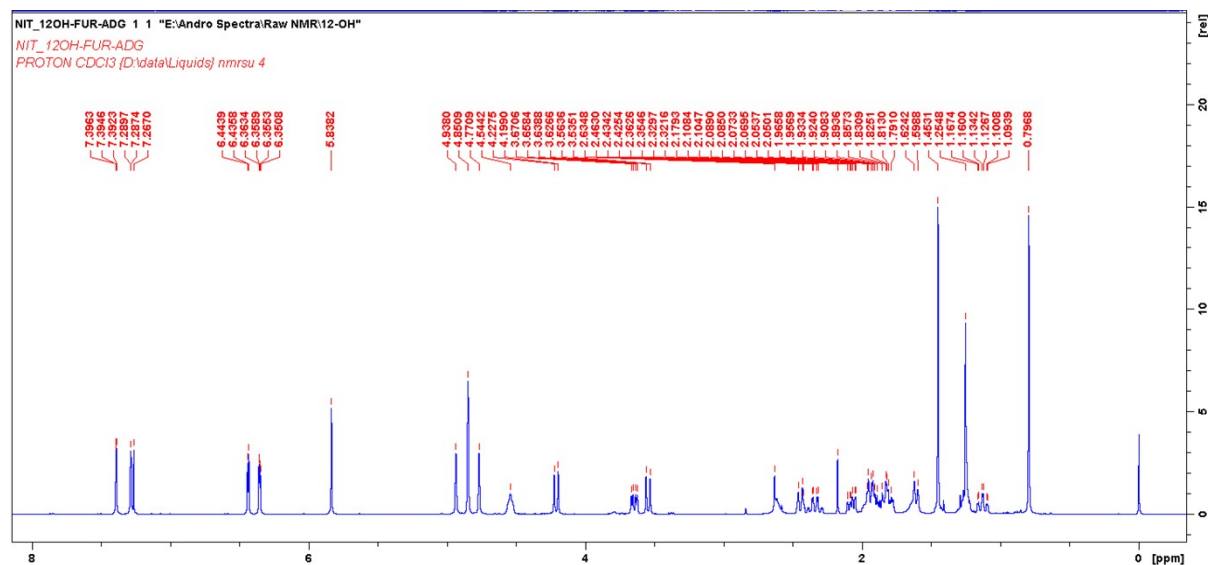

## <sup>13</sup>C NMR Spectrum

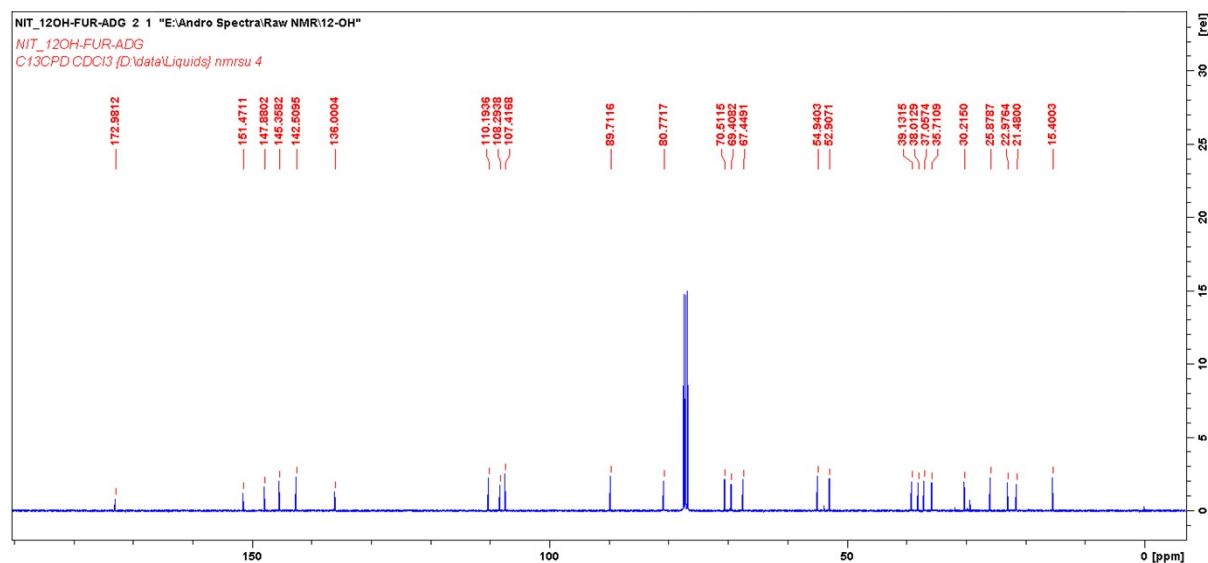

## Mass Spectrum

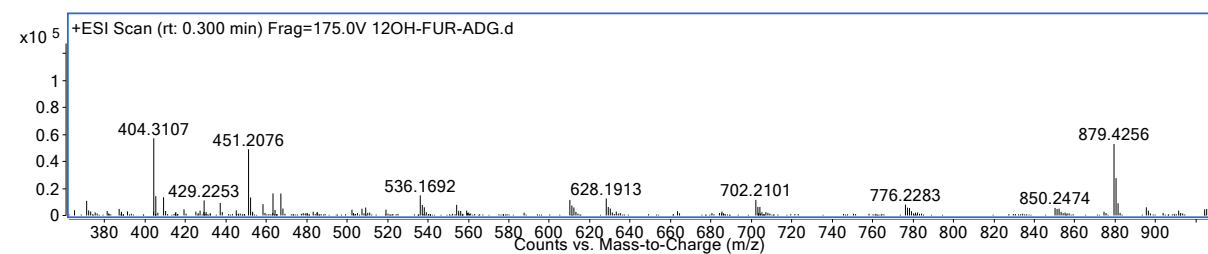

# 12-Hydroxy-3,19-(2-pyridilene)-andrographolide (3c)

## <sup>1</sup>H NMR Spectrum

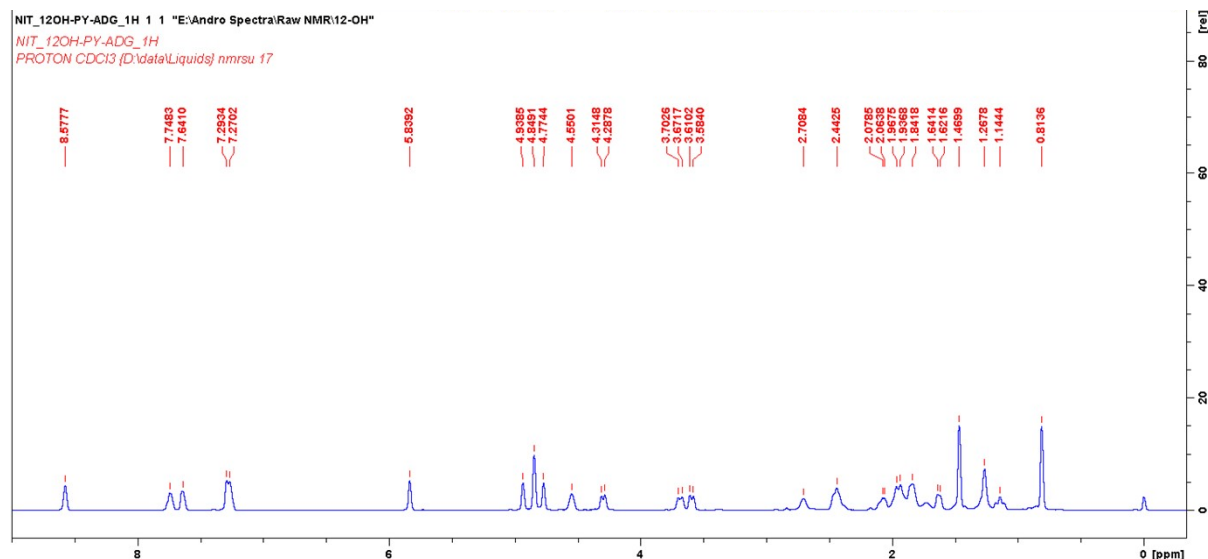

## <sup>13</sup>C NMR Spectrum

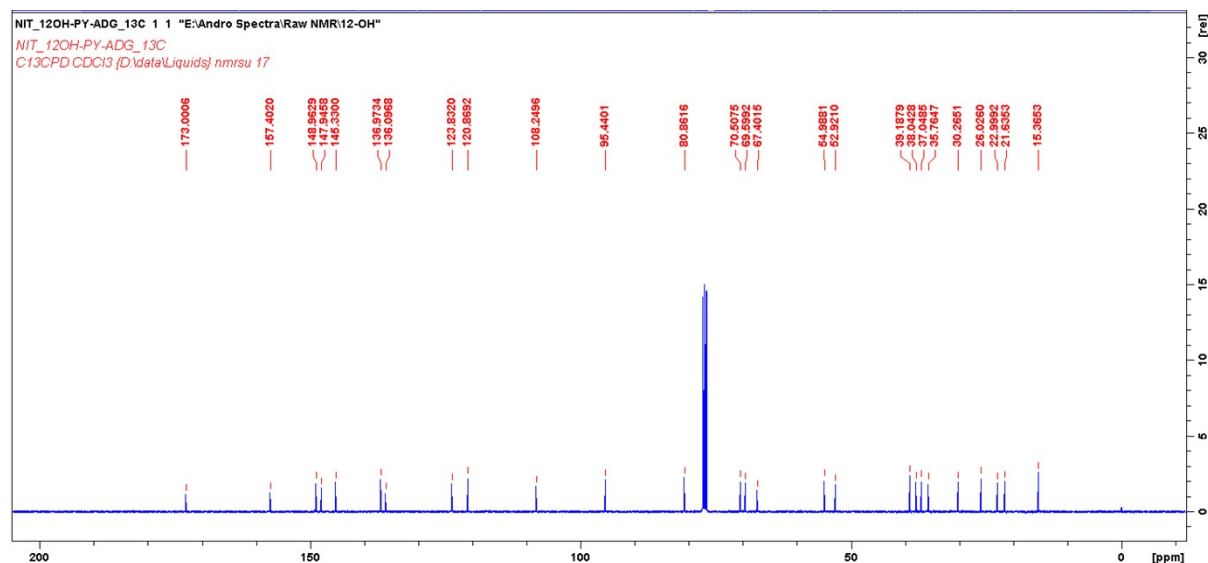

## Mass Spectrum

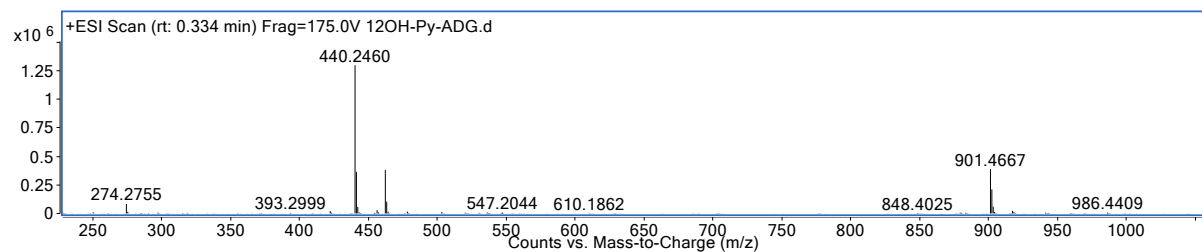

# HOMO-COSY

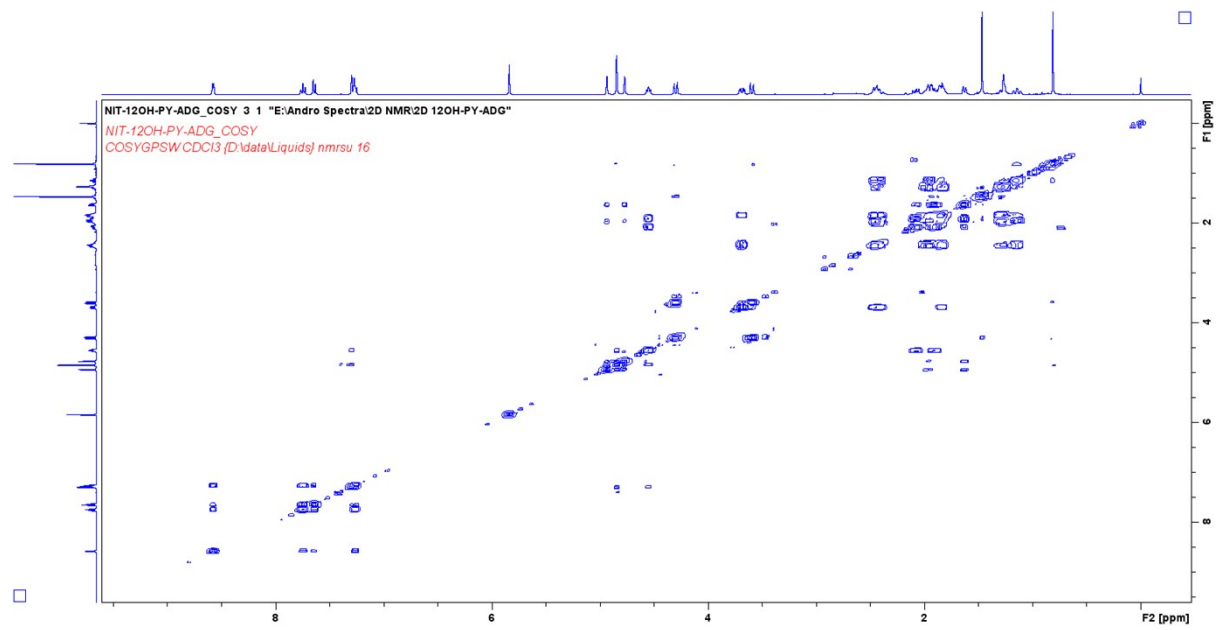

# HSQC

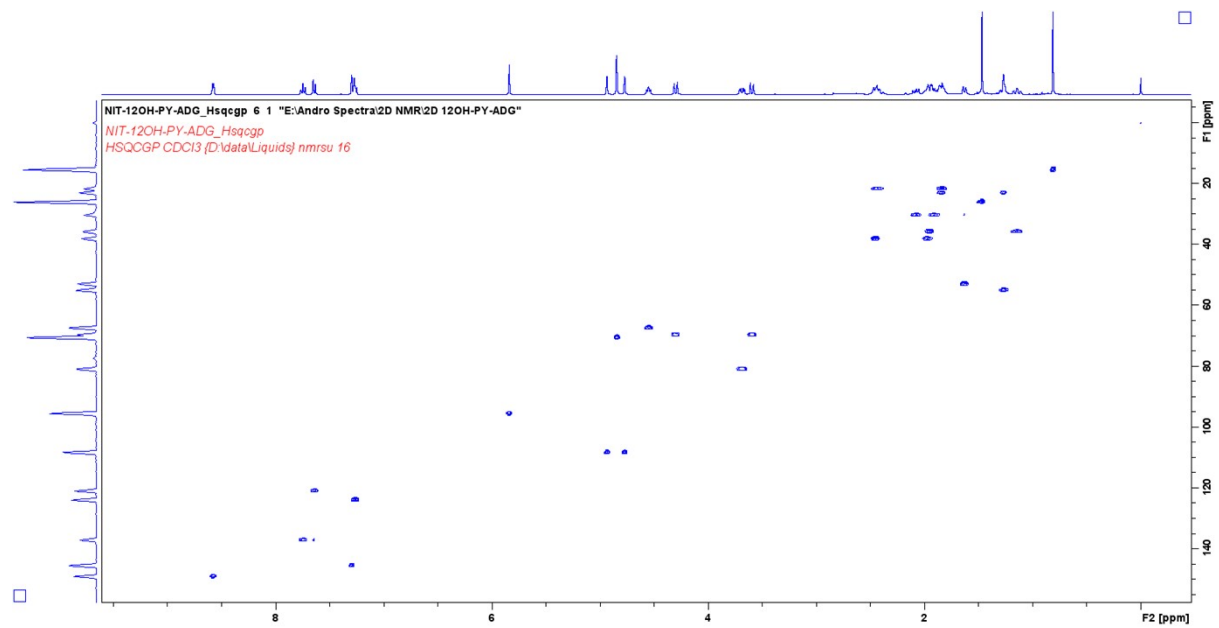

# 12-Hydroxy-3,19-(2-thiophenylidene)-andrographolide (3d)

## <sup>1</sup>H NMR Spectrum

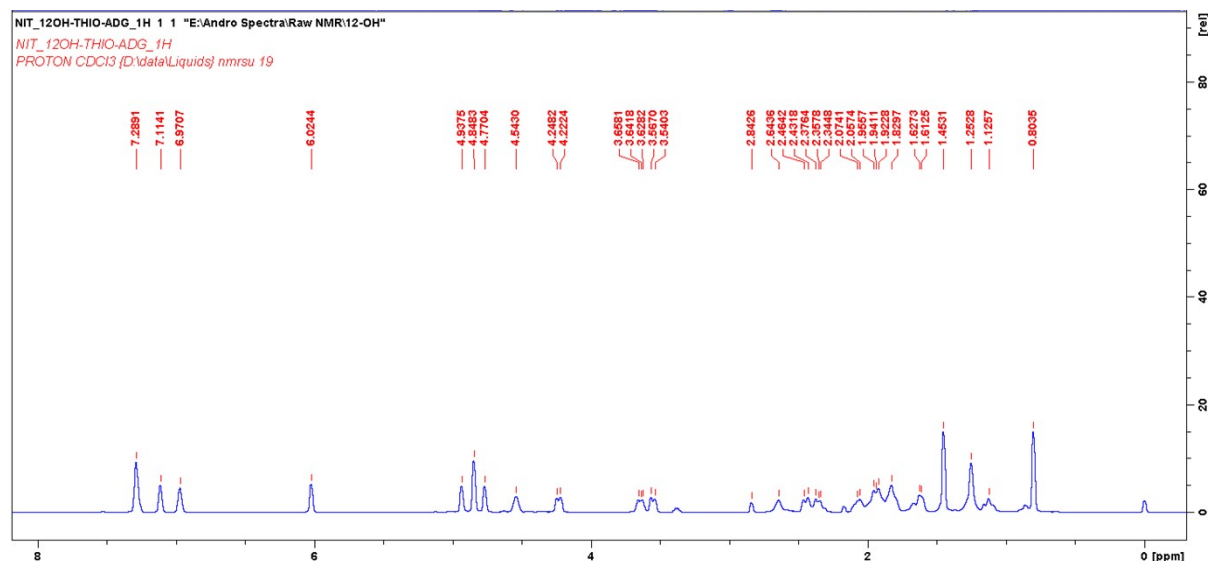

## <sup>13</sup>C NMR Spectrum

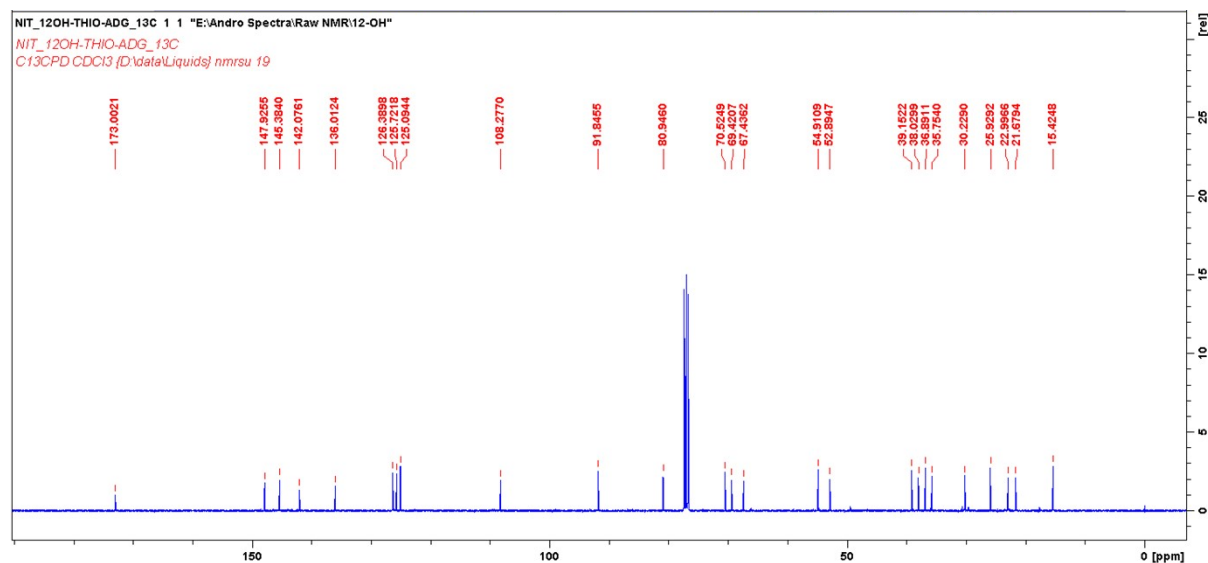

## Mass Spectrum

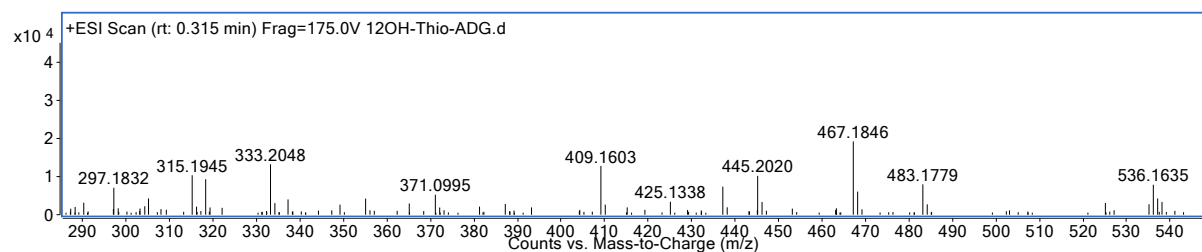

# 14-Deoxy-12-hydroxy-andrographolide (4)

## <sup>1</sup>H NMR Spectrum

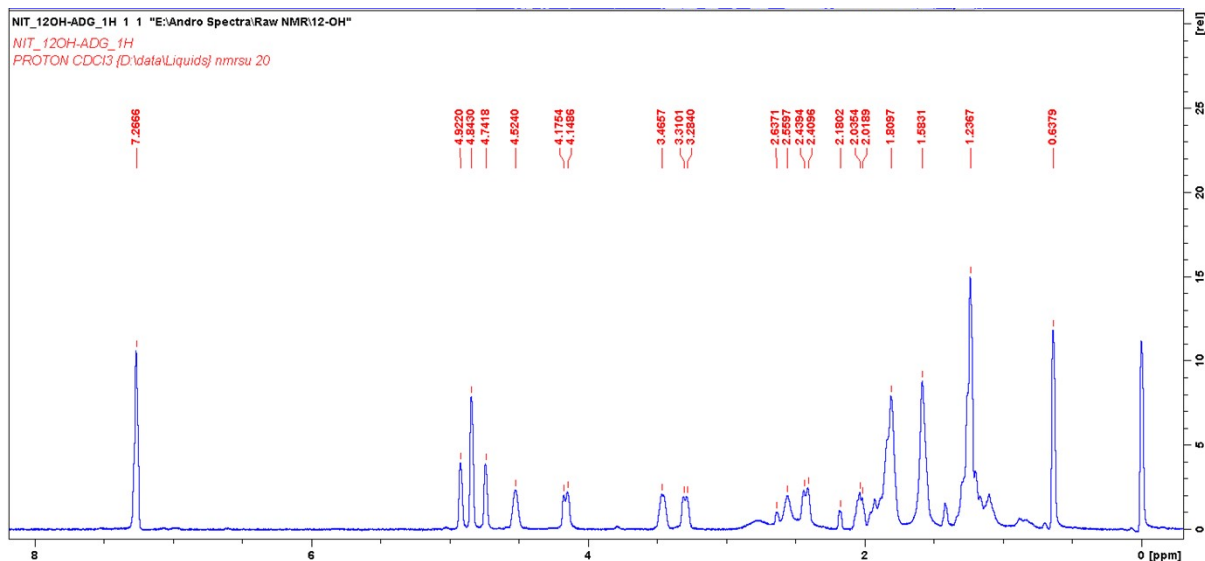

## <sup>13</sup>C NMR Spectrum

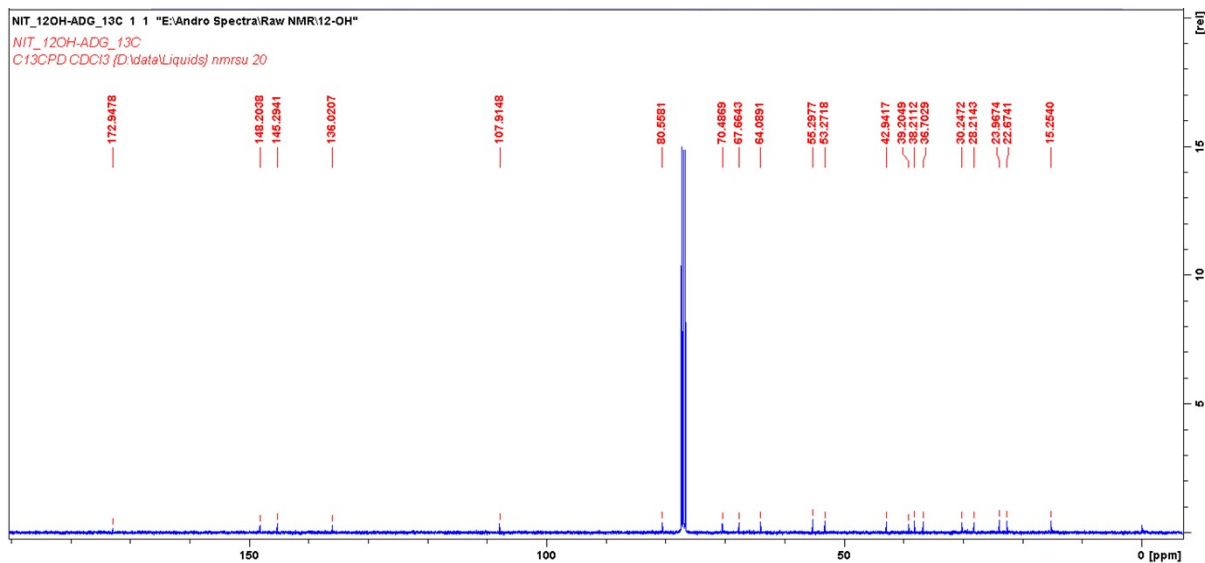

## Mass Spectrum

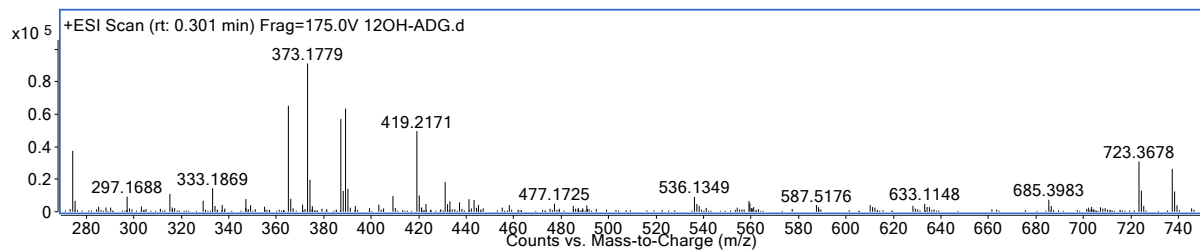

# Isoandrographolide (5)

## <sup>1</sup>H NMR Spectrum

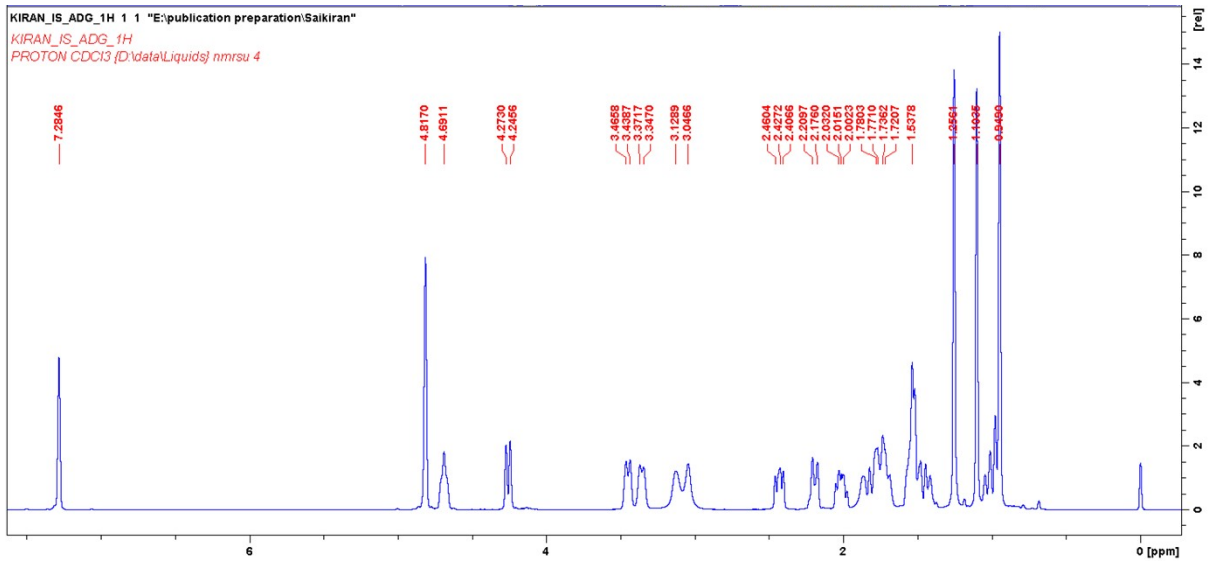

## <sup>13</sup>C NMR Spectrum

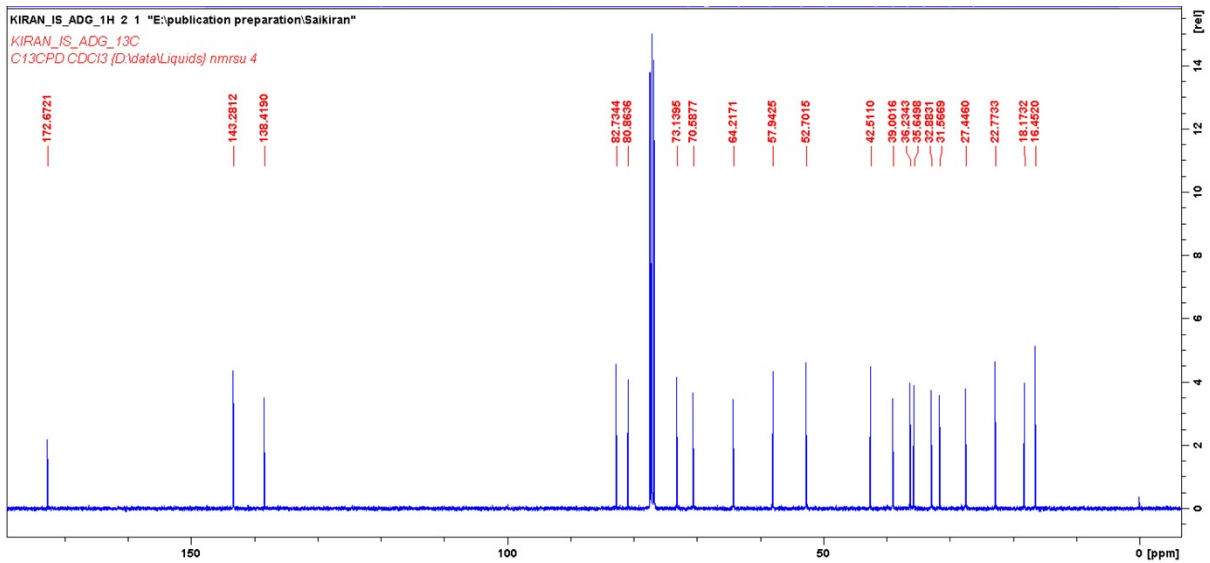

## Mass Spectrum

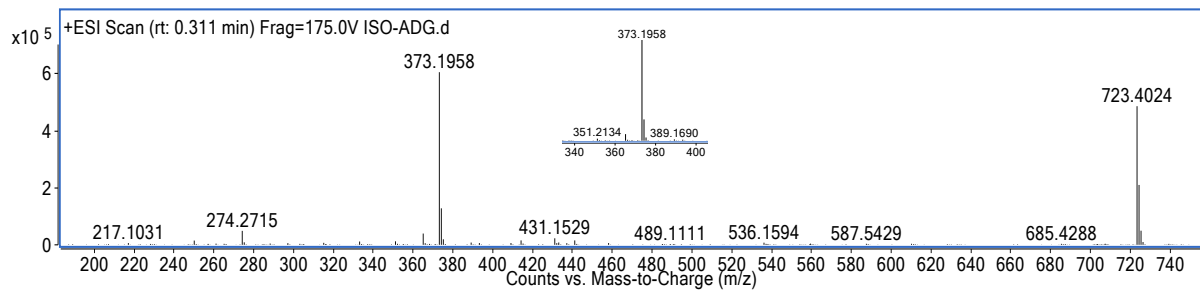

# 3,19-benzylidene-isoandrographolide (6a)

## <sup>1</sup>H NMR Spectrum

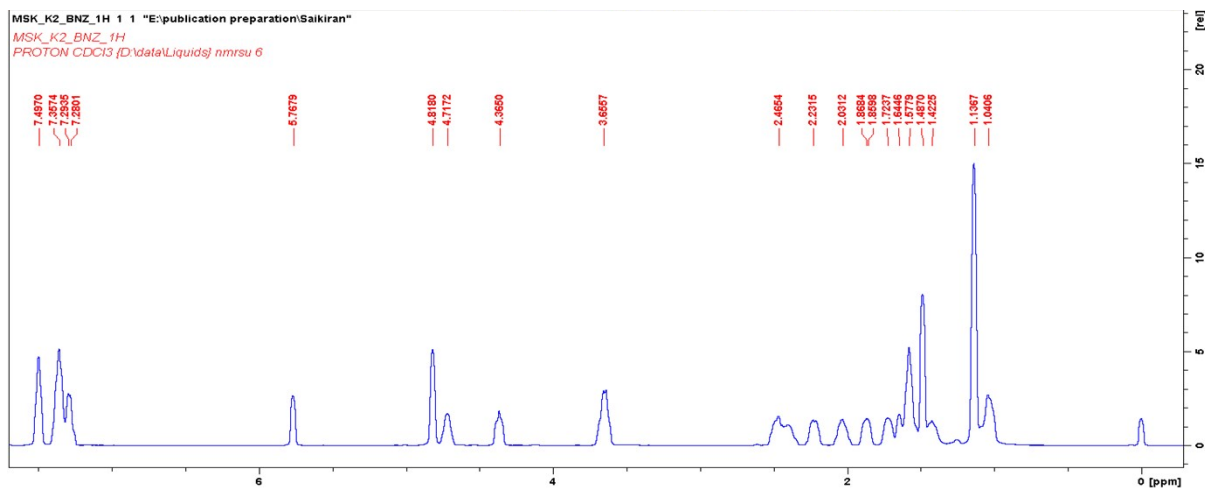

## <sup>13</sup>C NMR Spectrum

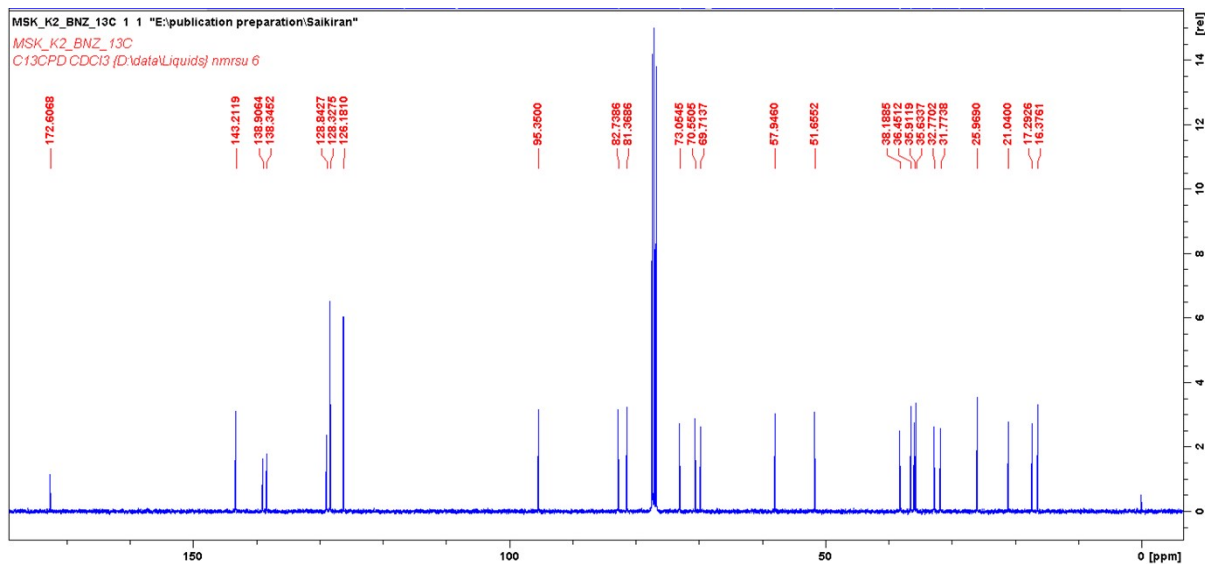

## Mass Spectrum

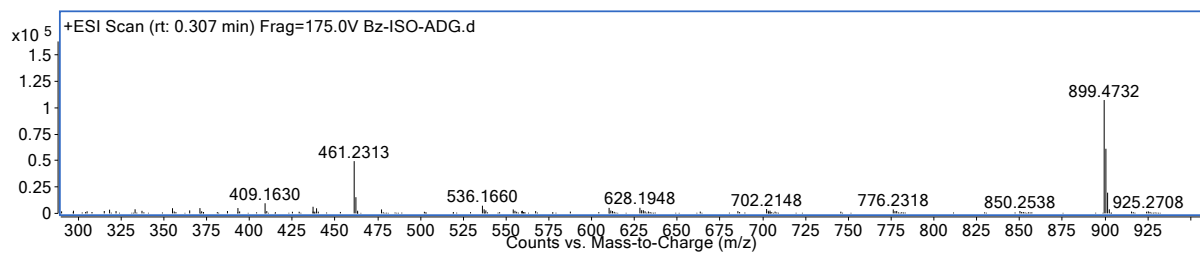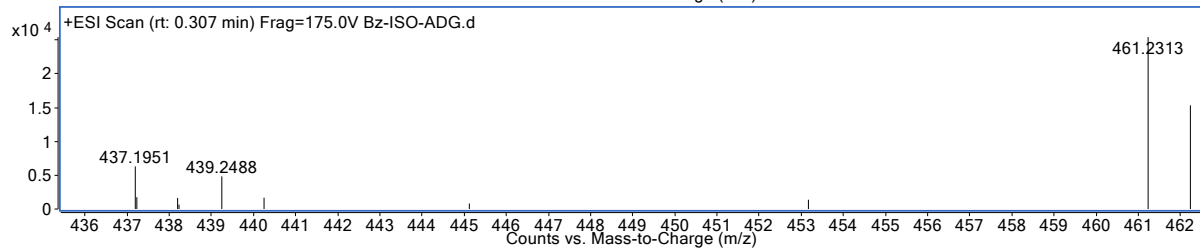

# 3,19-(2-Furfurylidene)-isoandrographolide (6b)

## <sup>1</sup>H NMR Spectrum

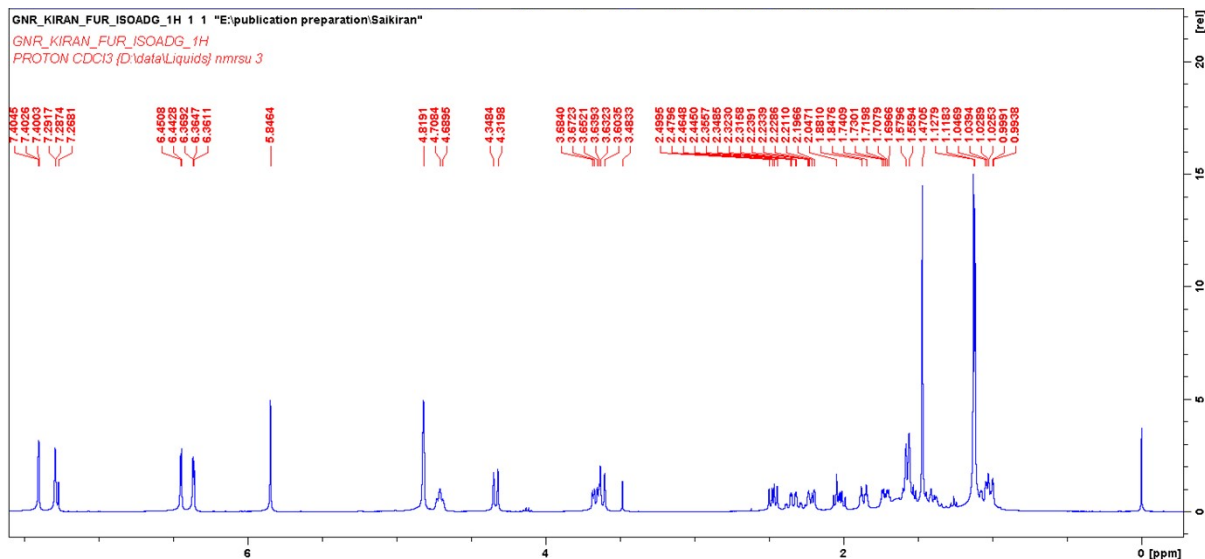

## <sup>13</sup>C NMR Spectrum

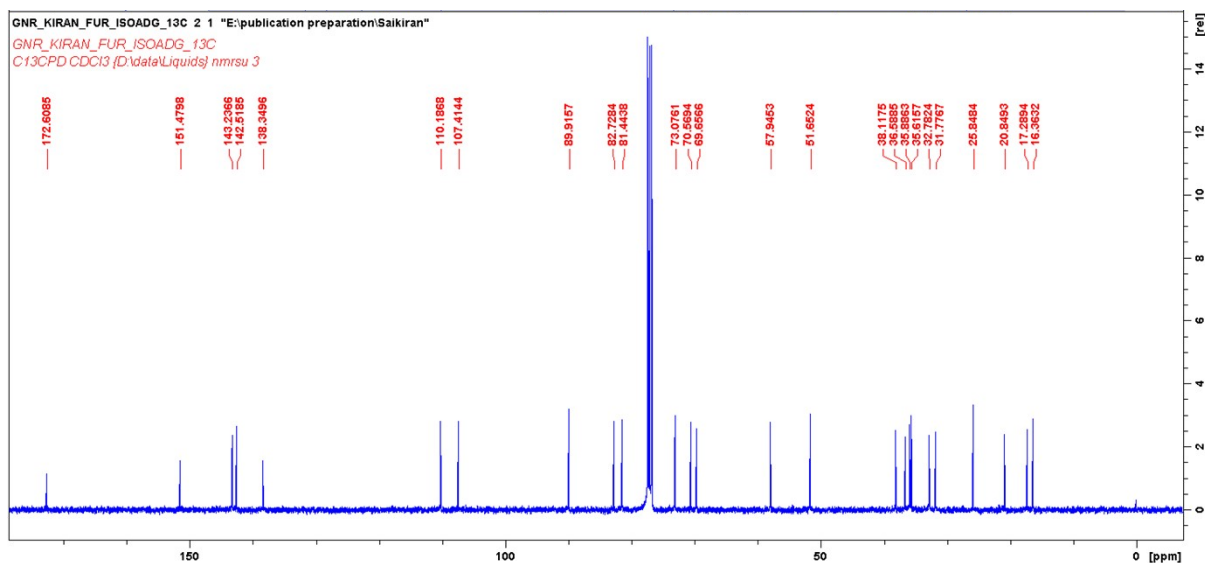

## Mass Spectrum

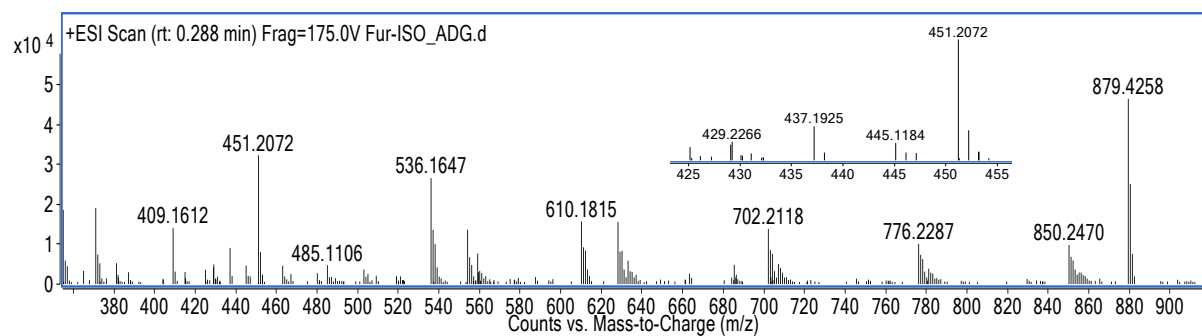



# 3,19-(2-Pyridylidene)-isoandrographolide (6c)

## <sup>1</sup>H NMR Spectrum

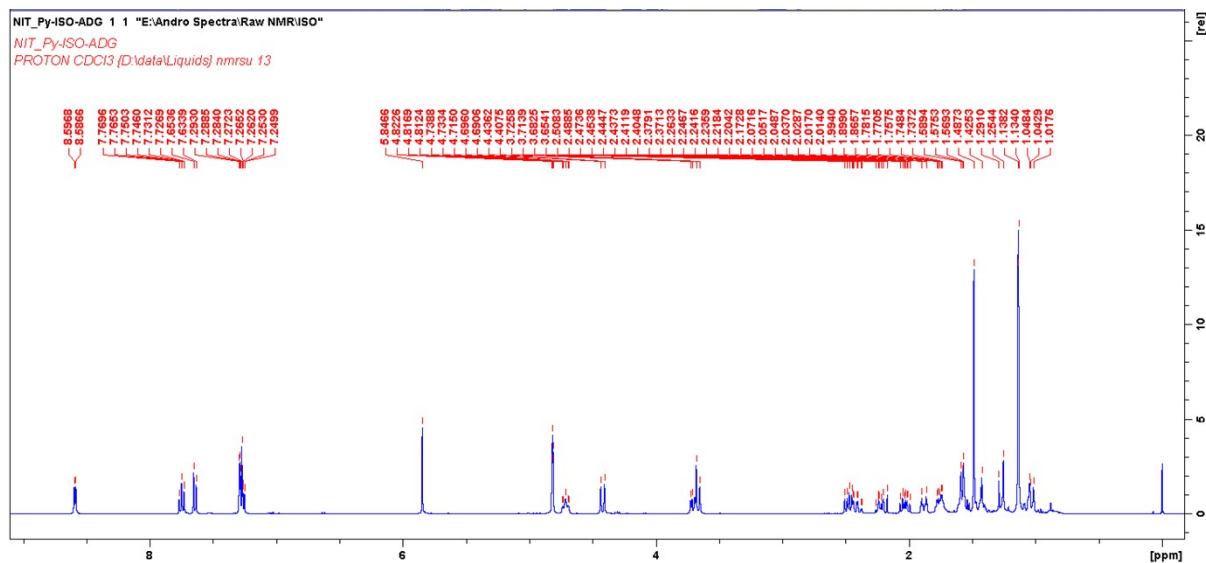

## <sup>13</sup>C NMR Spectrum

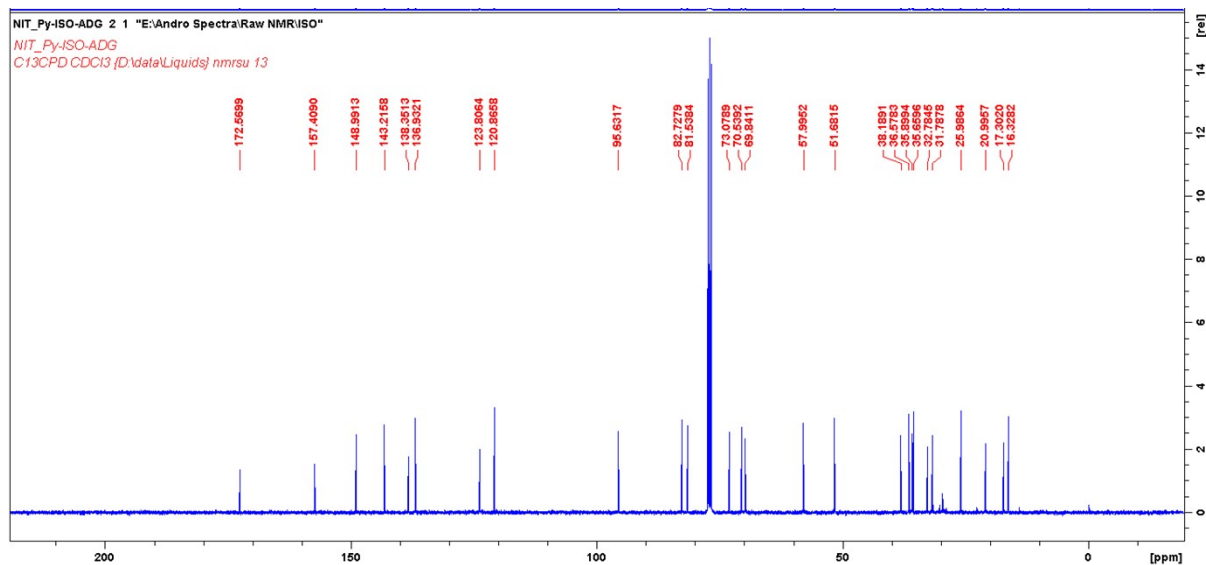

## Mass Spectrum

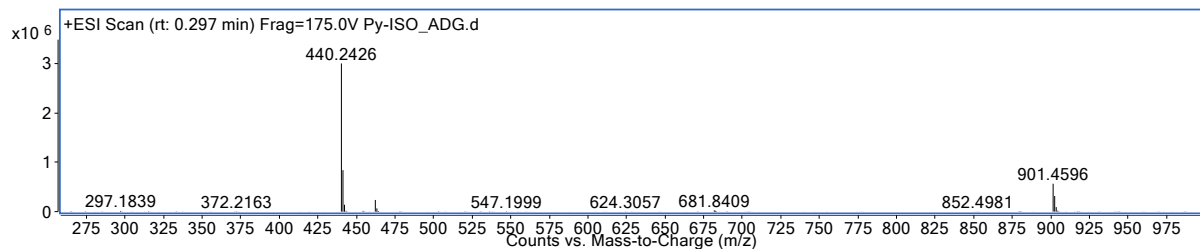

# HOMO-COSY

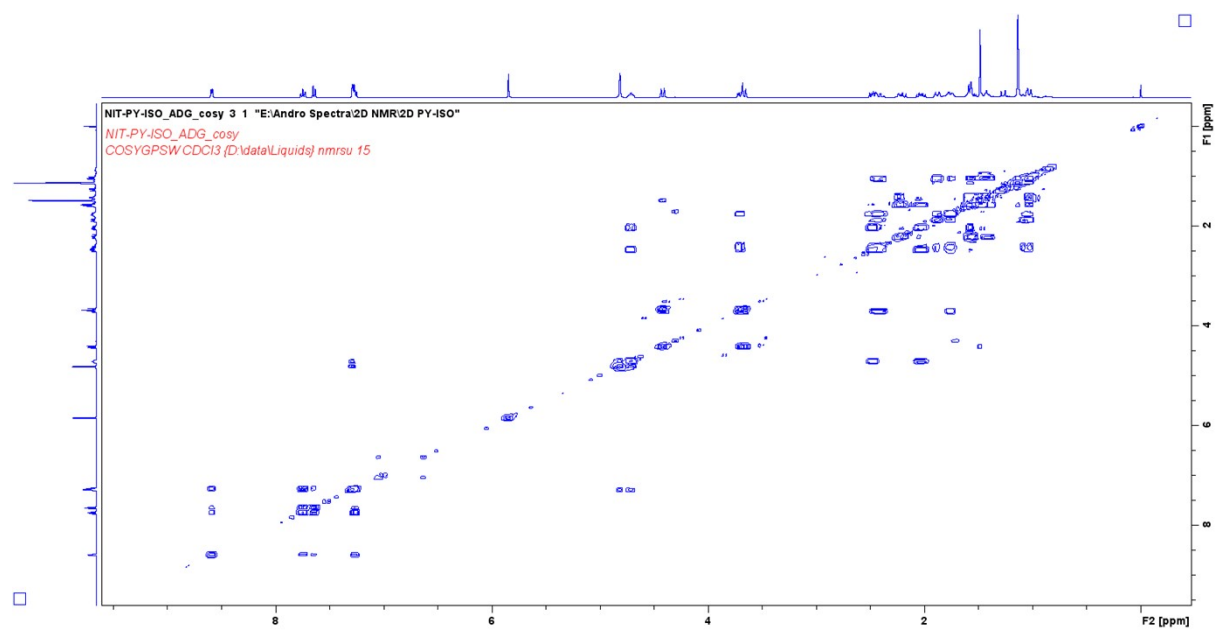

# HSQC

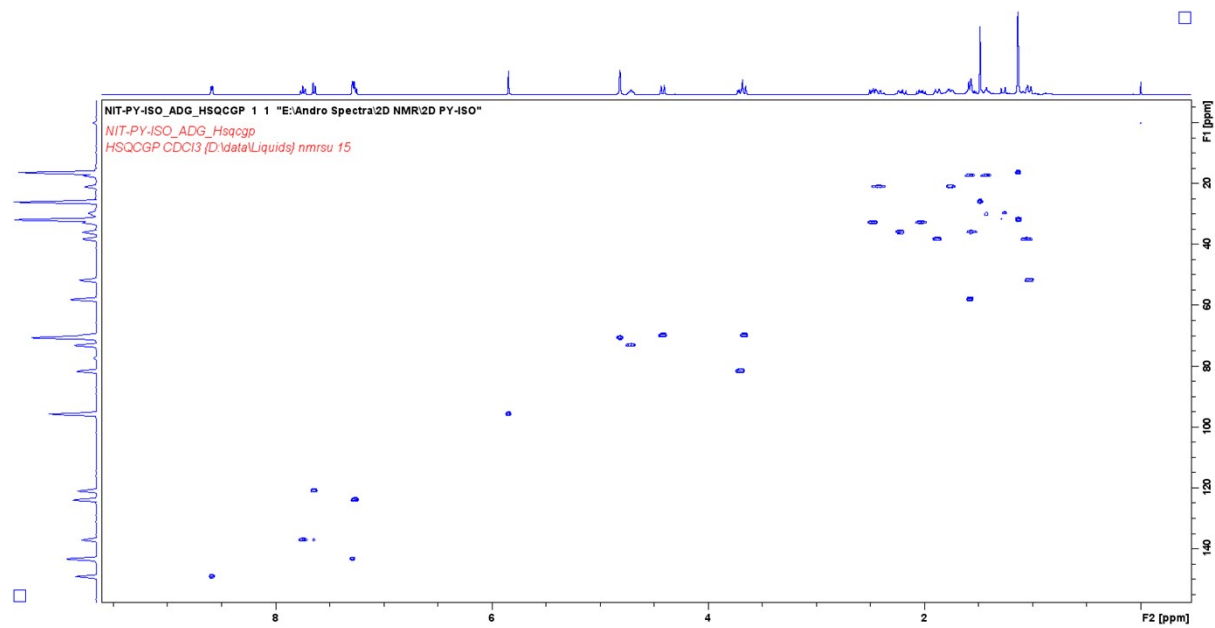

# 3,19-(2-Thiophenylidene)-isoandrographolide (**6d**)

## <sup>1</sup>H NMR Spectrum

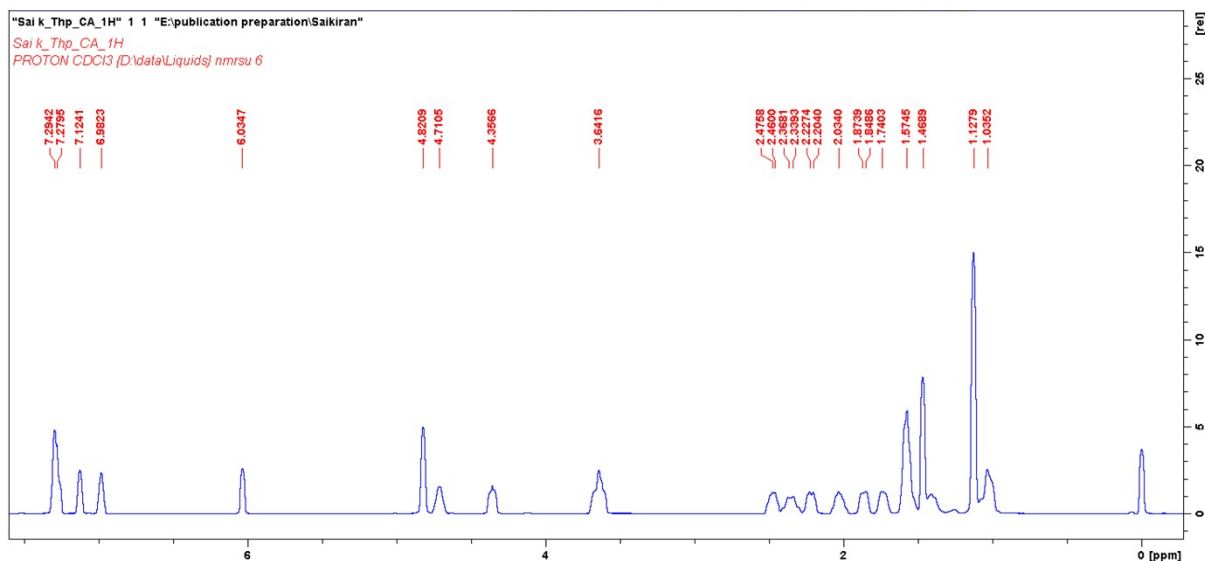

## <sup>13</sup>C NMR Spectrum

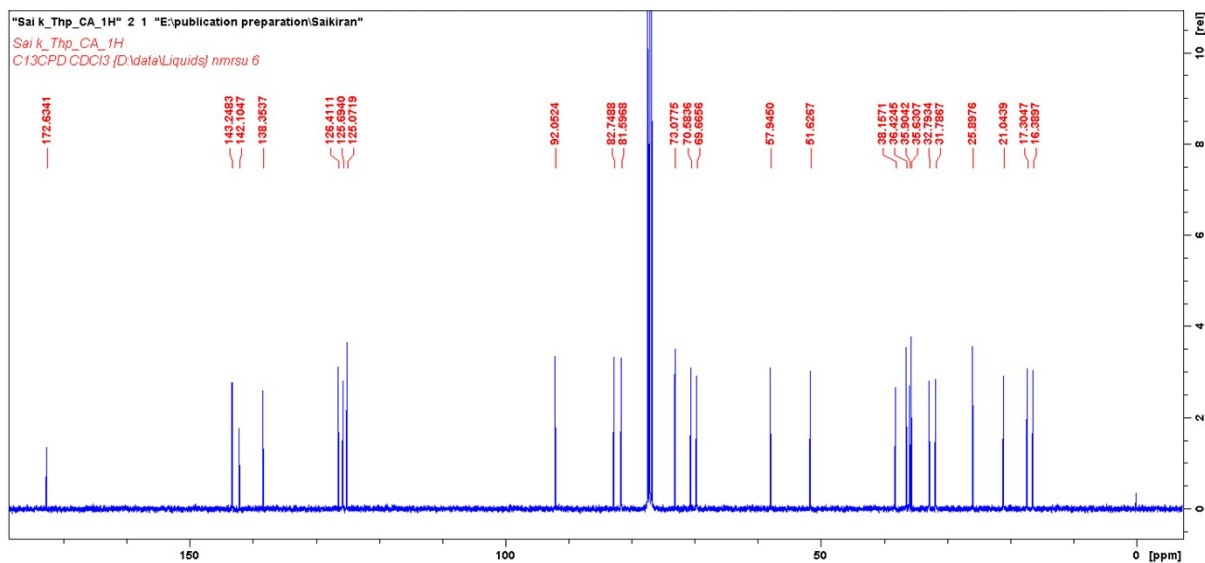

## Mass Spectrum

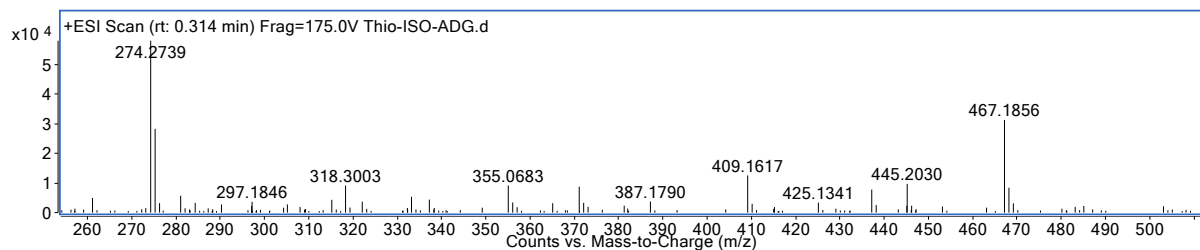

### Sulphorhodamine B Assay:

The human tumor cell lines of the cancer screening panel were grown in RPMI 1640 medium containing 5% fetal bovine serum and 2 mM L-glutamine. For a typical screening experiment, cells were inoculated into 96 well microtiter plates in 100  $\mu$ L at plating densities ranging from 5,000 to 40,000 cells/well depending on the doubling time of individual cell lines. After cell inoculation, the microtiter plates were incubated at 37° C, 5 % CO<sub>2</sub>, 95 % air and 100 % relative humidity for 24 h prior to addition of experimental drugs. After 24 h, two plates of each cell line were fixed *in situ* with TCA, to represent a measurement of the cell population for each cell line at the time of drug addition (Tz). Experimental drugs were solubilized in dimethyl sulfoxide at 400-fold the desired final maximum test concentration and stored frozen prior to use. At the time of drug addition, an aliquot of frozen concentrate was thawed and diluted to twice the desired final maximum test concentration with complete medium containing 50  $\mu$ g/ml gentamicin. Additional four, 10-fold or ½ log serial dilutions were made to provide a total of five drug concentrations plus control. Aliquots of 100  $\mu$ l of these different drug dilutions were added to the appropriate microtiter wells already containing 100  $\mu$ l of medium, resulting in the required final drug concentrations. Following drug addition, the plates were incubated for an additional 48 h at 37°C, 5 % CO<sub>2</sub>, 95 % air, and 100 % relative humidity. For adherent cells, the assay was terminated by the addition of cold TCA. Cells were fixed *in situ* by the gentle addition of 50  $\mu$ l of cold 50 % (w/v) TCA (final concentration, 10 % TCA) and incubated for 60 minutes at 4°C. The supernatant was discarded, and the plates were washed five times with tap water and air dried. Sulforhodamine B (SRB) solution (100  $\mu$ l) at 0.4 % (w/v) in 1 % acetic acid was added to each well, and plates were incubated for 10 minutes at room temperature. After staining, unbound dye was removed by washing five times with 1 % acetic acid and the plates were air dried. Bound stain was subsequently solubilized with 10 mM trizma base, and the absorbance was read on an automated plate reader at a wavelength of 515 nm. For suspension cells, the methodology was the same except that the assay was terminated by fixing settled cells at the bottom of the wells by gently adding 50  $\mu$ l of 80 % TCA (final concentration, 16 % TCA). Using the seven absorbance measurements [time zero, (Tz), control growth, (C), and test growth in the presence of drug at the five concentration levels (Ti)], the percentage growth was calculated at each of the drug concentrations levels[1,2].

Percentage growth inhibition was calculated as:

$$[(Ti-Tz)/(C-Tz)] \times 100 \text{ for concentrations for which } Ti \geq Tz$$

$$[(Ti-Tz)/Tz] \times 100 \text{ for concentrations for which } Ti < Tz.$$

Results for each compound (One dose data) were reported as percent growth inhibition of the treated cells when compared with untreated control cells. The number reported for the One-dose assay is growth inhibition relative to the no-drug control, and relative to the time zero number of cells.

**Table 1:** Growth Inhibition % of the tested compounds against Leukaemia Cancer cell lines

| Compound | Leukaemia Cancer |           |          |          |           |          |
|----------|------------------|-----------|----------|----------|-----------|----------|
|          | CCRF-CEM         | HL-60(TB) | K-562    | MOLT-4   | RPMI-8226 | SR       |
| 1        | 76.518           | -0.043    | 34.473   | 1.891    | 16.718    | 20.467   |
| 2a       | 90.972           | 51.122    | 56.312   | 16.038   | 71.779    | 63.124   |
| 2b       | 89.842           | 1.865     | 55.449   | 9.0511   | 82.883    | 70.994   |
| 2c       | 86.211           | 13.790    | 47.295   | 9.230    | 58.085    | 83.823   |
| 2d       | 66.7832          | -0.81538  | 23.5485  | 0.611945 | 29.46503  | 23.59896 |
| 3a       | 57.44093         | 15.43972  | 17.21649 | -1.6304  | 12.17347  | 8.928399 |
| 3b       | 55.42852         | 11.98941  | 26.27193 | -0.09145 | 20.47574  | 18.52426 |
| 3c       | 49.85908         | 10        | 20.96628 | 2.179335 | 23.0421   | 28.37051 |
| 3d       | 29.277           | 7.360911  | 8.091908 | 0.105795 | 6.834309  | 7.56749  |
| 4        | 39.76075         | 4.677132  | 26.86882 | -4.44939 | 16.22877  | 16.37696 |
| 5        | 1.140075         | -3.75882  | -6.69841 | -2.53097 | -2.3327   | -6.55106 |
| 6a       | 15.93967         | 0.531571  | 33.75518 | 7.028479 | 40.67797  | 12.6464  |
| 6b       | -1.3227          | 1.702208  | 7.42955  | 2.467475 | nd        | 4.279182 |
| 6c       | -3.89242         | 2.852529  | 4.735854 | -2.4127  | -4.69679  | -3.37448 |
| 6d       | 0.752415         | -5.42649  | 0.036744 | -2.38772 | 0.134973  | -8.46255 |

**Table 2:** Growth Inhibition % of the tested compounds against Non- Small cell Lung Cancer cell lines

| Compound | Non- Small cell Lung Cancer |          |          |          |          |          |           |          |          |           |
|----------|-----------------------------|----------|----------|----------|----------|----------|-----------|----------|----------|-----------|
|          | A549/ATCC                   | EKVX     | HOP-62   | HOP-92   | NCI-H226 | NCI-H23  | NCI-H322M | NCI-H460 | NCI-H522 | A549/ATCC |
| 1        | 12.17981                    | -4.74849 | 3.729777 | -7.70035 | 8.264506 | 2.107728 | 7.257867  | 2.023605 | 82.86785 | 12.17981  |
| 2a       | 7.436133                    | -0.15243 | -9.66659 | -4.56576 | 3.943978 | 3.155962 | 2.900184  | 0.219194 | 36.48218 | 7.436133  |
| 2b       | 4.33074                     | -1.7339  | -6.68933 | -12.4029 | nd       | 1.379746 | -2.98648  | 6.921003 | 36.90639 | 4.33074   |
| 2c       | 2.364054                    | -13.3594 | -2.53928 | -22.2169 | nd       | 0.368318 | 0.779082  | -0.31269 | 34.87133 | 2.364054  |
| 2d       | -1.66653                    | -2.89368 | -5.67142 | -7.61947 | nd       | -7.18257 | -3.62387  | 1.17133  | 15.89719 | -1.66653  |
| 3a       | -1.51921                    | -4.53137 | -9.00478 | -16.9301 | -2.36791 | -5.35575 | 2.601124  | -5.94628 | 14.67685 | -1.51921  |
| 3b       | -1.90328                    | -2.57178 | -15.0982 | -21.8673 | -5.64679 | -1.93935 | -2.71751  | -4.15312 | 12.73209 | -1.90328  |
| 3c       | -7.81194                    | -3.86797 | -11.1813 | -23.9685 | -1.25635 | -0.29916 | -6.20506  | -5.89712 | 19.38366 | -7.81194  |
| 3d       | 1.157776                    | -5.53405 | -13.2733 | -19.8139 | -2.8876  | -4.13325 | 0.15818   | -6.57442 | 10.2898  | 1.157776  |
| 4        | 4.04036                     | -1.66456 | -2.43024 | -0.61129 | -7.68403 | -3.94361 | -2.99678  | -3.46162 | 17.47577 | 4.04036   |
| 5        | -1.38674                    | 4.737894 | -1.48228 | -11.1634 | nd       | -7.83063 | -1.68244  | -12.0105 | 4.167624 | -1.38674  |
| 6a       | 2.765844                    | 22.98103 | 1.835665 | 19.52053 | nd       | 16.21347 | 8.125522  | -1.38325 | 17.37486 | 2.765844  |
| 6b       | -7.3602                     | 8.371837 | -5.19227 | -0.03348 | -1.03579 | -2.76495 | 1.093307  | -2.19269 | -8.85738 | -7.3602   |
| 6c       | -4.89042                    | -0.31194 | -3.15651 | -3.26976 | -6.56821 | -1.14408 | -6.03328  | -3.86686 | 3.167088 | -4.89042  |
| 6d       | 0.521607                    | 4.268997 | 1.317952 | -3.17493 | nd       | -1.14524 | 3.4673    | -7.11625 | 6.119009 | 0.521607  |

**Table 3:** Growth Inhibition % of the tested compounds against Colon Cancer cell lines

| Compound | Colon Cancer |          |          |          |          |          |          |
|----------|--------------|----------|----------|----------|----------|----------|----------|
|          | COLO 205     | HCC-2998 | HCT-116  | HCT-15   | HT29     | KM12     | SW-620   |
| 1        | 5.097646     | -14.3897 | 39.98749 | 38.11131 | 72.99512 | 19.75982 | 55.71462 |
| 2a       | -7.70086     | -8.21094 | 61.62855 | 34.48492 | 45.20326 | 13.94366 | 50.33401 |
| 2b       | -18.4298     | -10.7528 | 48.53267 | 40.8254  | 36.91639 | 7.577149 | 54.62084 |
| 2c       | -22.0892     | -12.8871 | 38.35728 | 28.68756 | 30.12295 | -1.46775 | 51.49171 |
| 2d       | -16.683      | -12.5799 | 15.56572 | 13.59204 | 15.95049 | -1.11809 | 8.400032 |
| 3a       | -16.2004     | -6.64234 | 17.33525 | 10.79678 | 3.750146 | -2.51952 | -5.00389 |
| 3b       | -16.911      | -5.18023 | 14.22497 | 11.54679 | -1.93201 | -2.52974 | 2.338001 |
| 3c       | -27.3344     | -14.0253 | 16.11826 | 13.13765 | -3.01286 | 2.286736 | 9.539144 |
| 3d       | -13.0703     | -4.85242 | 9.143477 | 6.459341 | -1.99997 | -0.62805 | -12.489  |
| 4        | -30.0445     | -4.41568 | 4.595258 | 9.090909 | 3.493163 | -10.5681 | 5.086791 |
| 5        | -15.8258     | -2.56102 | -3.15721 | -1.77933 | -1.89252 | -9.36922 | -7.10549 |
| 6a       | -1.75914     | 6.088575 | 11.91993 | 9.140509 | 9.870989 | 3.271698 | -1.26404 |
| 6b       | -10.1189     | -5.13963 | -3.56709 | 2.349979 | -4.94404 | -3.39016 | -6.56877 |
| 6c       | -14.7909     | -9.44081 | -9.14597 | -5.70147 | -14.3573 | -10.5154 | -7.95751 |
| 6d       | -14.0819     | -0.9288  | -1.56262 | -0.86341 | 1.884867 | -3.5976  | -4.55443 |

**Table 4:** Growth Inhibition % of the tested compounds against CNS Cancer cell lines

| Compound  | CNS Cancer |          |          |          |          |          |          |          |          |          |
|-----------|------------|----------|----------|----------|----------|----------|----------|----------|----------|----------|
|           | SF-268     | SF-295   | SF-539   | SNB-19   | SNB-75   | U251     | SF-268   | SF-295   | SF-539   | SNB-19   |
| <b>1</b>  | 2.342445   | -13.8934 | 16.58965 | 11.96799 | 38.04721 | 24.20832 | 2.342445 | -13.8934 | 16.58965 | 11.96799 |
| <b>2a</b> | 2.52919    | -2.41272 | 7.943713 | 2.968575 | -0.04726 | 35.75192 | 2.52919  | -2.41272 | 7.943713 | 2.968575 |
| <b>2b</b> | -1.248     | -4.60775 | -6.71624 | 3.429213 | -13.931  | 35.83239 | -1.248   | -4.60775 | -6.71624 | 3.429213 |
| <b>2c</b> | 1.676046   | -10.6696 | -2.90218 | 3.234801 | 1.079393 | 26.98123 | 1.676046 | -10.6696 | -2.90218 | 3.234801 |
| <b>2d</b> | -0.92889   | -3.97328 | -4.62695 | -2.36024 | -1.20229 | 7.296883 | -0.92889 | -3.97328 | -4.62695 | -2.36024 |
| <b>3a</b> | 1.001441   | -7.18298 | 3.69639  | 2.914272 | 0.560867 | 0.436273 | 1.001441 | -7.18298 | 3.69639  | 2.914272 |
| <b>3b</b> | -0.02794   | -9.56201 | -0.43917 | -1.34735 | 9.27866  | 5.685859 | -0.02794 | -9.56201 | -0.43917 | -1.34735 |
| <b>3c</b> | 0.067659   | -8.72207 | 2.542648 | -3.444   | 6.979465 | 6.390977 | 0.067659 | -8.72207 | 2.542648 | -3.444   |
| <b>3d</b> | -1.57393   | -4.8884  | -0.34624 | -2.66833 | 4.597146 | -1.08475 | -1.57393 | -4.8884  | -0.34624 | -2.66833 |
| <b>4</b>  | 1.208589   | -3.36158 | -7.83748 | 2.129426 | 3.619588 | 11.77299 | 1.208589 | -3.36158 | -7.83748 | 2.129426 |
| <b>5</b>  | 1.271145   | -1.04743 | -2.45255 | -1.31035 | 3.532483 | -6.14965 | 1.271145 | -1.04743 | -2.45255 | -1.31035 |
| <b>6a</b> | -0.34731   | 7.205885 | 1.799286 | 8.562396 | 7.919101 | 2.798619 | -0.34731 | 7.205885 | 1.799286 | 8.562396 |
| <b>6b</b> | 1.460968   | 2.050555 | -6.64267 | 2.660183 | nd       | -9.70436 | 1.460968 | 2.050555 | -6.64267 | 2.660183 |
| <b>6c</b> | -0.90348   | -8.98585 | 2.448624 | -1.32439 | 12.15794 | -4.476   | -0.90348 | -8.98585 | 2.448624 | -1.32439 |
| <b>6d</b> | -0.69703   | 0.970115 | 4.473282 | 4.950583 | 6.70733  | -0.05143 | -0.69703 | 0.970115 | 4.473282 | 4.950583 |

**Table 5:** Growth Inhibition % of the tested compounds against Melanoma Cancer cell lines

| Compound  | Melanoma Cancer |          |          |            |          |           |          |          |          |
|-----------|-----------------|----------|----------|------------|----------|-----------|----------|----------|----------|
|           | LOX-IMVI        | MALME-3M | M14      | MDA-MB-435 | SK-MEL-2 | SK-MEL-28 | SK-MEL-5 | UACC-257 | UACC-62  |
| <b>1</b>  | 78.16154        | 0.218196 | 15.12195 | 27.37977   | nd       | 4.539677  | 22.73368 | 23.48627 | 30.07967 |
| <b>2a</b> | 66.1861         | -10.4165 | nd       | 18.60171   | 6.650645 | -7.43907  | 5.322558 | 15.01493 | 14.25062 |
| <b>2b</b> | 77.96371        | -3.05899 | 8.019613 | 13.0865    | -2.73307 | -12.7638  | 6.683541 | 1.695226 | 8.89902  |
| <b>2c</b> | 77.02182        | -1.0191  | 10.00439 | 16.7776    | -2.09028 | -5.77773  | 0.851203 | 2.451067 | 5.155385 |
| <b>2d</b> | 27.00125        | -3.00992 | 3.221985 | 1.74135    | -9.3376  | -15.1647  | -0.01183 | -0.22851 | 3.722504 |
| <b>3a</b> | 19.99031        | -8.56206 | nd       | 5.07403    | -8.60063 | -6.00623  | -3.37004 | 1.477887 | 10.59767 |
| <b>3b</b> | 31.32191        | -2.19278 | nd       | 7.448958   | -7.50768 | -7.5937   | -3.52539 | -1.48202 | 8.341647 |
| <b>3c</b> | 34.63518        | -6.97634 | nd       | 4.643198   | -3.66304 | -0.67743  | -2.80027 | 0.169683 | 7.720058 |
| <b>3d</b> | 9.522512        | -3.987   | nd       | 2.55658    | -6.31825 | -8.05098  | -1.72603 | 2.118111 | 7.470734 |
| <b>4</b>  | 27.13617        | -4.86654 | nd       | 5.352311   | -2.9893  | -8.23296  | -1.26076 | 6.911724 | 11.07706 |
| <b>5</b>  | -0.47063        | -1.13163 | 3.056935 | -6.85379   | -3.27373 | -13.033   | 2.144214 | -3.5308  | 3.315564 |
| <b>6a</b> | 7.503063        | 8.36235  | 7.994866 | 1.954539   | -3.31887 | -5.03408  | 32.13259 | -1.05914 | 24.25126 |
| <b>6b</b> | -6.18904        | 1.461066 | 1.397853 | -2.81738   | -31.3758 | -5.63     | -0.52232 | -10.4703 | 12.15696 |
| <b>6c</b> | -2.72863        | -12.0334 | nd       | -3.32761   | -15.8592 | -10.0567  | -4.37129 | -7.03767 | 7.421066 |
| <b>6d</b> | 1.119416        | 3.63739  | 2.06889  | -3.17793   | -0.11819 | -3.46193  | 0.641514 | -0.9581  | 5.135694 |

**Table 6:** Growth Inhibition % of the tested compounds against Ovarian Cancer cell lines

| Compound  | Ovarian Cancer |          |          |          |          |             |          |
|-----------|----------------|----------|----------|----------|----------|-------------|----------|
|           | IGROV1         | OVCAR-3  | OVCAR-4  | OVCAR-5  | OVCAR-8  | NCI/ADR-RES | SK-OV-3  |
| <b>1</b>  | -3.71225       | 40.82735 | 17.12707 | -4.2449  | 15.52401 | 16.25265    | -3.76095 |
| <b>2a</b> | 10.65958       | 36.22771 | 16.61592 | -5.46211 | 43.42864 | 42.98087    | -19.4454 |
| <b>2b</b> | -3.54913       | 25.53807 | 16.16274 | -22.2076 | 42.62078 | 23.2814     | nd       |
| <b>2c</b> | -4.59588       | 15.85242 | 19.48269 | -23.8692 | 26.3734  | 12.0729     | nd       |
| <b>2d</b> | -8.12495       | -3.07692 | 8.386053 | -24.0803 | 21.32794 | 6.237558    | nd       |
| <b>3a</b> | 5.633267       | 1.173862 | 6.580458 | -11.9063 | 21.00358 | 6.427082    | -17.4886 |
| <b>3b</b> | -0.05686       | -1.59773 | 0.018262 | -12.375  | 11.21848 | 10.98565    | -15.6418 |
| <b>3c</b> | -7.75531       | 3.229344 | 1.542636 | -18.2733 | 7.621071 | 10.40566    | -11.7911 |
| <b>3d</b> | -2.03711       | -5.32913 | -3.16639 | -10.1415 | 6.233056 | 0.658246    | -10.3236 |
| <b>4</b>  | -6.80717       | 6.75526  | 5.31261  | -19.6476 | 1.458116 | 2.005152    | -13.1397 |
| <b>5</b>  | -3.289         | -13.5144 | 0.920197 | -5.675   | -4.17616 | -7.27906    | nd       |
| <b>6a</b> | 13.78575       | 2.456371 | 22.89379 | 5.286986 | 0.474368 | 9.687814    | nd       |
| <b>6b</b> | 6.214865       | -5.49876 | -2.66172 | 0.205039 | -7.94036 | 1.476462    | -20.5756 |
| <b>6c</b> | -4.10212       | -5.04591 | -3.24759 | -5.77868 | -1.37489 | -2.0656     | -1.47416 |
| <b>6d</b> | -3.36385       | -9.23737 | -4.11369 | 1.443825 | -3.00923 | -4.43436    | nd       |

**Table 7:** Growth Inhibition % of the tested compounds against Renal Cancer cell lines

| Compound | Renal Cancer |          |          |          |          |          |          |          |          |
|----------|--------------|----------|----------|----------|----------|----------|----------|----------|----------|
|          | 786-0        | A498     | ACHN     | CAKI-1   | RXF 393  | SN12C    | TK-10    | UO-31    | 786-0    |
| 1        | 15.29208     | 12.20705 | 10.24531 | 3.296389 | -25.2361 | 18.27    | 2.51443  | 10.40465 | 15.29208 |
| 2a       | -10.7473     | -8.62841 | -0.20235 | 16.29632 | -26.5488 | 20.06998 | -9.00035 | 24.3178  | -10.7473 |
| 2b       | 1.365011     | -19.9553 | 1.265066 | -7.85137 | -8.04901 | 14.75034 | -24.7327 | 8.409321 | 1.365011 |
| 2c       | 0.161687     | -25.1424 | -1.35471 | -8.05508 | -14.3982 | 11.64314 | -20.7023 | 1.701089 | 0.161687 |
| 2d       | -7.44642     | -13.8553 | -4.14588 | -2.23003 | -19.5717 | 6.788896 | -9.88623 | 13.1346  | -7.44642 |
| 3a       | -15.8143     | -2.64448 | 1.584158 | 6.941495 | -19.8211 | 9.981548 | -10.9972 | 14.72382 | -15.8143 |
| 3b       | -15.8147     | -5.50512 | -9.3836  | 4.257348 | -16.7287 | 5.560834 | -14.8161 | 9.881319 | -15.8147 |
| 3c       | -13.9463     | -2.13864 | -12.5827 | 0.982598 | -10.0608 | 2.239986 | -14.2188 | 0.746018 | -13.9463 |
| 3d       | -13.4615     | 13.29368 | -6.90137 | 3.066767 | -26.7037 | 5.098487 | -10.8115 | 6.134491 | -13.4615 |
| 4        | -11.0738     | 5.558554 | -0.89538 | -1.45011 | -22.9985 | 13.21139 | -14.0514 | 0.622311 | -11.0738 |
| 5        | 2.032269     | -10.6764 | -6.62127 | 2.220923 | -25.1127 | -2.37082 | -4.78448 | 11.88076 | 2.032269 |
| 6a       | 8.841477     | 9.66937  | 12.82063 | 18.15403 | -10.966  | 10.20994 | 10.20661 | 36.14554 | 8.841477 |
| 6b       | 6.562337     | -2.81594 | -2.36473 | 7.604927 | 0.713596 | 3.551148 | -4.94442 | 18.48387 | 6.562337 |
| 6c       | -0.00455     | -5.47238 | -5.67206 | 4.1957   | -10.1231 | 1.6191   | -7.71039 | 9.857435 | -0.00455 |
| 6d       | 7.186504     | -5.22597 | -0.51635 | 3.251603 | -22.8222 | 0.186279 | 4.682111 | 18.93457 | 7.186504 |

**Table 8:** Growth Inhibition % of the tested compounds against Prostate and Breast Cancer cell lines

| Compound | Prostate Cancer |          | Breast Cancer |          |          |          |          |            |
|----------|-----------------|----------|---------------|----------|----------|----------|----------|------------|
|          | PC-3            | DU-145   | MCF7          | MDA-MB-  | HS 578T  | BT-549   | T-47D    | MDA-MB-468 |
|          |                 |          |               | 231/ATCC |          |          |          |            |
| 1        | 6.601658        | 19.94372 | 42.44727      | -6.74523 | -10.3345 | 12.88968 | 12.23692 | 58.00483   |
| 2a       | 17.64745        | 7.873114 | 53.91392      | 0.653746 | -0.69875 | 36.15292 | 29.35306 | 8.585889   |
| 2b       | 15.2328         | 6.356672 | 51.30576      | -14.7872 | -7.98918 | -9.90585 | 14.22202 | 18.63407   |
| 2c       | 5.167519        | 10.11836 | 36.01204      | -15.1366 | -6.87678 | -2.18949 | 6.839594 | 17.86614   |
| 2d       | 5.544554        | -3.30896 | 27.86736      | -11.8672 | -4.31048 | -13.7768 | 5.781722 | -1.86002   |
| 3a       | 5.132461        | -0.10069 | 17.60966      | -3.89002 | -2.56237 | 2.504883 | 7.979027 | -2.0113    |
| 3b       | 4.145475        | -5.09818 | 25.37701      | -5.06754 | -5.12832 | -9.61316 | 1.200512 | 9.708329   |
| 3c       | 2.926291        | -1.20275 | 22.46522      | -5.86651 | -0.96261 | -0.47808 | -4.71578 | 12.90283   |
| 3d       | -4.89874        | -6.98849 | 17.78289      | -11.3157 | -1.86687 | -3.24041 | -1.24244 | 3.78498    |
| 4        | 0.327753        | -2.2685  | 23.04531      | -10.1357 | 7.730078 | -8.50448 | 3.440516 | 9.231381   |
| 5        | -5.33407        | -12.0189 | 3.657464      | -5.08589 | -6.7395  | -11.2866 | -4.86008 | -6.04553   |
| 6a       | 13.84161        | -1.43348 | 24.42675      | 12.86242 | -5.34263 | 6.592913 | 39.78549 | 28.09138   |
| 6b       | 9.453757        | -6.80928 | 1.149466      | 9.756184 | -7.14238 | nd       | -0.80355 | 8.176459   |
| 6c       | -1.34037        | -10.1304 | -2.57475      | 1.286377 | 3.728219 | -15.4621 | -4.03887 | 2.014309   |
| 6d       | -0.06416        | -9.52929 | 9.51125       | -1.53234 | -3.12795 | -4.64591 | 1.690624 | -0.28966   |

## Reference

- [1] M.R. Grever, S.A. Schepartz, B.A. Chabner, The National Cancer Institute: cancer drug discovery and development program., in: Semin. Oncol., 1992: pp. 622–638.
- [2] P. Skehan, R. Storeng, D. Scudiero, A. Monks, J. McMahon, D. Vistica, J.T. Warren, H. Bokesch, S. Kenney, M.R. Boyd, New colorimetric cytotoxicity assay for anticancer-drug screening, JNCI J. Natl. Cancer Inst. 82 (1990) 1107–1112.
